# Supplementary material for: Influence of crustal mechanical layering on the seismic potential of active faults: insights from the southwestern Valencia Trough (W Mediterranean)
Source: Copernicus journal article supplement (doi:10.5194/egusphere-2025-1782), 2025-05-14
Supplement: Supplementary file [file egusphere-2025-1782-RC1-supplement.pdf]

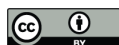

1     **Influence of crustal mechanical layering on the seismic potential of active**  
2     **faults: insights from the southwestern Valencia Trough (W Mediterranean)**

3

4     Martin-Rojas, Iván<sup>1</sup>

5     Ramos, Adriá<sup>1</sup>

6     De Ruig, Menno<sup>2</sup>

7     Medina-Cascales, Iván<sup>1</sup>

8     Santamaría-Pérez, Eva<sup>1</sup>

9     Alfaro, Pedro<sup>1</sup>

10

11     1 Dpto. de Ciencias de la Tierra y del Medio Ambiente, Universidad de Alicante,

12     Campus San Vicente s/n, 03690, San Vicente del Raspeig, Alicante.

13     ivan.martin@ua.es

14     2. Oropesa BV, Van Bleiswijkstraat 183, 2582 LD The Hague, Netherlands.

15     [menno.deruig@gmail.com](mailto:menno.deruig@gmail.com)

16

17     Corresponding author: Martin-Rojas, Iván

18     Dpto. de Ciencias de la Tierra y del Medio Ambiente, Universidad de Alicante,

19     Campus San Vicente s/n, 03690, San Vicente del Raspeig, Alicante.

20     ivan.martin@ua.es

21

22

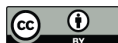

23 **Short summary**

24 This study investigates the main active faults located within the southwestern  
25 Valencia Trough, an offshore region east of the Spanish coast. Utilizing subsurface  
26 data, we identify and characterize the 3D geometry of several of these faults for the  
27 first time. Given that active faults pose a significant natural hazard due to their  
28 potential to generate earthquakes, we also assess the seismic potential of the faults  
29 within the southwestern Valencia Trough.

30

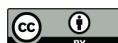

31 **ABSTRACT**

32

33 We present a structural and seismotectonic analysis of active faults in the  
34 southwestern Valencia Trough (western Mediterranean) on the basis of subsurface  
35 datasets. In our study, we identify and characterise three major active faults: the  
36 Cullera Fault, with a long-term slip rates that vary over time between  $0.15 \pm 0.1$   
37 mm/yr and  $0.4 \pm 0.1$  mm/yr; the oblique Albufera Fault, with a long-term slip rate of  
38  $0.2 \pm 0.1$  mm/yr; and the normal Valencia Fault.

39 The seismogenic character of the southwestern Valencia Trough is controlled by a  
40 mechanically weak layer consisting of Triassic evaporites. This weak layer induces  
41 partial to complete decoupling between the suprasalt and subsalt successions,  
42 leading to two distinct mechanisms driving fault displacement: tectonic activity and  
43 salt withdrawal. A quantitative evolutionary analysis of the Cullera Fault reveals that  
44 these two mechanisms alternate over time.

45 The presence of a mechanically weak layer has implications for seismicity.  
46 Earthquakes can nucleate within both sub- and suprasalt successions, with total or  
47 partial decoupling influencing rupture propagation. We discuss how these two  
48 scenarios lead to different earthquakes and thus impact the seismic hazard of a  
49 region. Empirical source-scaling relationships, which are commonly used to  
50 estimate the seismogenic potential of active faults, generally assume a  
51 homogeneous seismogenic crust. To address this limitation, we propose a  
52 methodological approach based on the use of the aspect ratio. Our findings  
53 highlight the need to incorporate stratigraphic mechanical layering into seismic

54 hazard assessments, particularly in salt-influenced tectonic settings.

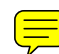

55

56

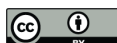

57 **1. Introduction**

58 Seismic-hazard analyses are often performed by scaling relationships. These  
59 relationships are regressions in which the seismogenic potential of active faults is  
60 derived from geometric parameters of the fault, such as the potential fault rupture  
61 length or area (Stirling et al., 2013). Pioneering works on scaling relationships began  
62 in the 1970s (Kanamori & Anderson, 1975; Geller, 1976). The regressions of Wells &  
63 Coppersmith (1994) represent a milestone in the application of scaling  
64 relationships, as they included a very large dataset of historical earthquakes. The  
65 equations proposed by Wells & Coppersmith became a standard for determining  
66 the seismogenic potential of active faults. Subsequently, other scaling relationships  
67 have been proposed, accounting for factors such as the tectonic environment, fault  
68 dip, or seismogenic thickness (Stirling et al., 2002 and 2013; Leonard 2010 and  
69 2014; Huang et al., 2024, among many others).

70 Most scaling relationships employed to evaluate crustal earthquakes correlate the  
71 moment magnitude ( $M_w$ ) with the fault dimensions (length, width, and/or area).  
72 Some of these scaling relationships consider the fault width vs. fault dip growth of  
73 ruptures for large earthquakes, as rupture width is limited by the maximum depth of  
74 the seismogenic crust (Leonard, 2010; Yen and Ma, 2011; Leonard, 2014; Cheng et  
75 al., 2019). However, these relationships do not consider the influence of potential  
76 heterogeneities within the seismogenic crust, which could control the propagation  
77 of ruptures and, therefore, the magnitude of earthquakes.

78 Here, we present an analysis of several subsurface datasets, including high-  
79 resolution seismic profiles, from the southwestern Valencia Trough. We identify and  
80 characterise the main active faults in this region, and we carry out a detailed  
81 geometric description. The results of this analysis also emphasize that this region is  
82 characterised by a mechanically weak layer within the seismogenic crust. After  
83 mapping the main faults, we apply conventional scaling relationships to evaluate  
84 the potential magnitudes of future earthquakes. We propose a methodological  
85 approach for integrating the effects of mechanically weak layers—such as Triassic  
86 evaporites—into routine seismic hazard assessments, highlighting the need to  
87 refine existing scaling relationships in tectonically complex settings.

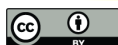

## 88 2. Tectonic setting

89 The Valencia Trough is an extensional basin located in the western Mediterranean  
90 region (Fig. 1). This basin is the result of polyphase tectonic evolution spanning from  
91 the Triassic to the present day, as it is located between the Betic-Balearic fold-and-  
92 thrust belt to the south, the Iberian Chain to the west, and the Catalan Coastal  
93 Ranges to the north (De Ruig, 1992; Guimerà & Álvaro, 1990; Maillard & Mauffret,  
94 1999; Roca & Desegaulx, 1992; Roca et al., 2004; Vergés & Fernández, 2012). The  
95 tectonic evolution of the Valencia Trough is also partially influenced by extension  
96 related to the retreat of the Maghrebian–Ligurian Tethys subduction slab (Etheve et  
97 al., 2016; Faccenna et al., 2004; Jolivet & Faccenna, 2000; Maillard & Mauffret, 1999;  
98 Rehault et al., 1984; Roca et al., 1999; Séranne, 1999; van Hinsbergen et al., 2014).

99 The Valencia Trough (Fig. 1) underwent a Mesozoic rifting process related to the  
100 Iberian intraplate rift and the opening of the Western Tethys (Arche and López-  
101 Gómez, 1996; Nebot and Guimerà, 2018; Ramos et al., 2023; Salas et al., 2001). This  
102 process led to the formation of NW–SE and NE–SW high-angle faults offsetting the  
103 pre-Mesozoic basement and to the deposition of a 5–15-km-thick Upper Jurassic–  
104 Lower Cretaceous succession.

105 During the Late Cretaceous, the onset of convergence between Nubia and Eurasia  
106 caused the transition from a Mesozoic extensional tectonic regime to successive  
107 compressional and extensional stages (Roca, 2001; Salas et al., 2001; Vergés and  
108 Sàbat, 1999). From the late Eocene to the Oligocene, the Valencia Trough was  
109 dominated by shortening. Onshore, this episode led to the formation of the  
110 intraplate Iberian Chain and Catalan Coastal Ranges (Gaspar-Escribano et al.,  
111 2004; Geel, 1995; Guimerà and Álvaro, 1990).

112 From the late Oligocene to the middle Miocene, the western Mediterranean region  
113 was subsequently affected by an extensional regime, driven by the complex  
114 interplay between the European–Cenozoic rift system (e.g., Séranne, 1999) and the  
115 rollback of the Maghrebian–Ligurian Tethys slab (Faccenna et al., 2004; van  
116 Hinsbergen et al., 2014). This extensional phase led to the formation of the Liguro-  
117 Provençal and Algerian Basins, as well as the Valencia Trough. However, subsidence  
118 in the southwestern Valencia Trough during this period cannot be accounted for by

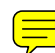



119 rifting, due to the limited occurrence of Cenozoic basement extensional faults  
120 (Roca and Guimerà, 1992). Therefore, extension has been interpreted as due to the  
121 collapse of a back-arc transient uplift event (Fang et al., 2021).

122 The extension in the Valencia Trough occurred immediately before or synchronously  
123 with the formation of the compressional Betic Cordillera. This compressional  
124 deformation is well expressed by a thin-skinned fold-and-thrust system observed in  
125 the Eastern Betic Cordillera (De Ruig, 1995; Sàbat et al., 2011) and in the Balearic  
126 Promontory (Mallorca and Ibiza Islands). At the same time, significant magmatic  
127 activity took place in the area, and was divided into two phases: (1) late Oligocene  
128 to Serravallian calc-alkaline activity and (2) Tortonian to present alkaline volcanic  
129 activity (Martí et al., 1992).

130 From the Pliocene to the present, the tectonic setting in the Valencia Trough has  
131 been dominated by NE–SW extension, as indicated by focal mechanisms (Stich et  
132 al., 2010) and broad regional global navigation satellite system (GNSS) analyses  
133 (Stich et al., 2006). This extension has been related to thermal subsidence (Roca,  
134 1992, 1996, and 2001; Roca and Guimerà, 1992; Roca et al., 1999a; Gaspar-  
135 Escribano et al., 2004) and has been interpreted as the final stage of an aborted rift  
136 event responsible for the ENE motion of the Balearic promontory (Palano et al.,  
137 2015). Several normal active faults have been defined in the southwestern Valencia  
138 Trough thus far (Fig. 1): the Western Cabo Cullera Fault, Central–Western Cabo  
139 Cullera Fault, Central–Eastern Cabo Cullera Fault, Eastern Cabo Cullera Fault and  
140 Southwest Columbretes Fault (Perea, 2006). Some of these faults were previously  
141 recognised from vintage seismic lines (Díaz del Río et al., 1986; Roca, 1992, 1996;  
142 Perea, 2006; Maillard & Mauffret, 2013), but fault traces and geometry were defined  
143 only very approximately. Similarly, the slip rates derived from the displacement of  
144 Plio-Quaternary seismic reflectors observed in the vintage seismic lines present  
145 high uncertainties ( $0.02 \pm 0.01$  mm/yr; Perea, 2006). In the Valencia Trough,  
146 seismicity is characterised by low- to moderate-magnitude events (Fig. 1). The few  
147 available focal mechanisms (Stich et al., 2010; IGN, 2025) indicate a normal–  
148 oblique or strike slip kinematics, although these focal mechanisms present high  
149 uncertainties, mainly because they occur at long distances from seismic stations

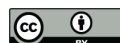

150 and are registered with significant azimuthal gaps (González, 2017). According to  
151 the data published by the Spanish Earthquake Catalogue (IGN, 2025), this  
152 seismicity is very shallow, as most of the events are assigned depths of less than 10  
153 km (Fig. 2). However, ~~once again~~, these data should be taken with caution, as the  
154 depths assigned to these earthquakes present high uncertainties (González, 2017).

155 In the onshore domain located west of the Valencia Trough, only one major active  
156 structure, namely, the Jumilla Fault, has been postulated (García-Mayordomo et al.,  
157 2012), together with other minor active faults (Alcoy, Mariola, and Benasau Faults).  
158 In this onshore area, several significant historical earthquakes have occurred, such  
159 as the 1396 Tavernes ( $I_{EMS98}=VIII-IX$ ), 1620 Alcoy ( $I_{EMS98}=VIII-IX$ ), 1644 Muro ( $I_{EMS98}=V$ )  
160 and 1748 Estubeny ( $I_{EMS98}=IX$ ) earthquakes (Martínez Solares and Mezcua, 2002;  
161 IGN, 2025; Bufo et al., 2010; Bufo & Udías, 2022).

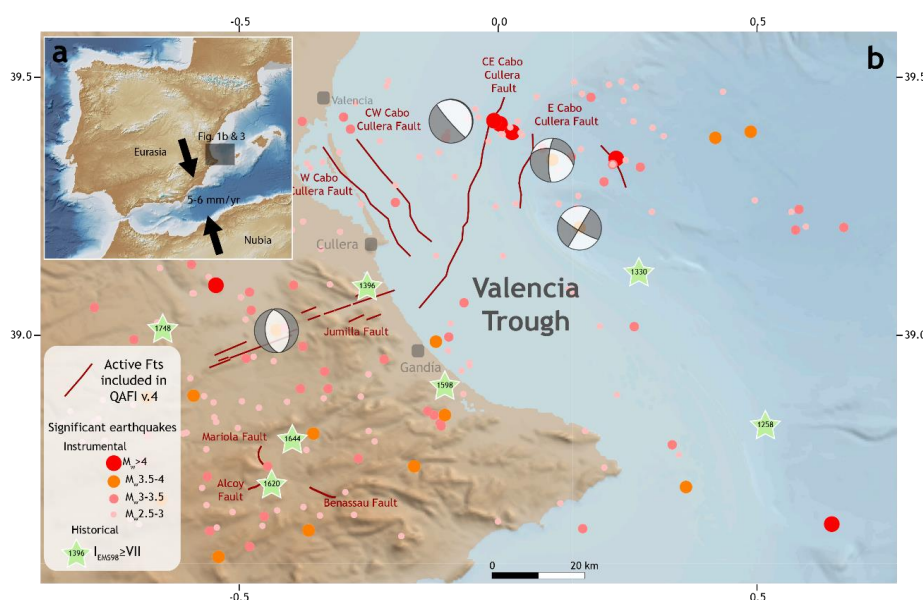

162  
163 Fig. 1. a. Location of the Valencia Trough. Convergence vectors between Nubia and  
164 Eurasia are after DeMets et al., 1994; McClusky et al., 2003; Nocquet, 2012;  
165 Nocquet & Calais, 2003; Pérez-Peña et al., 2010; Serpelloni et al., 2007; Stich et al.,  
166 2006. b. Seismotectonic map of the southwestern Valencia Trough and surrounding  
167 areas. Fault traces from Quaternary-Active Faults of Iberia database (García-  
168 Mayordomo et al., 2012)



169

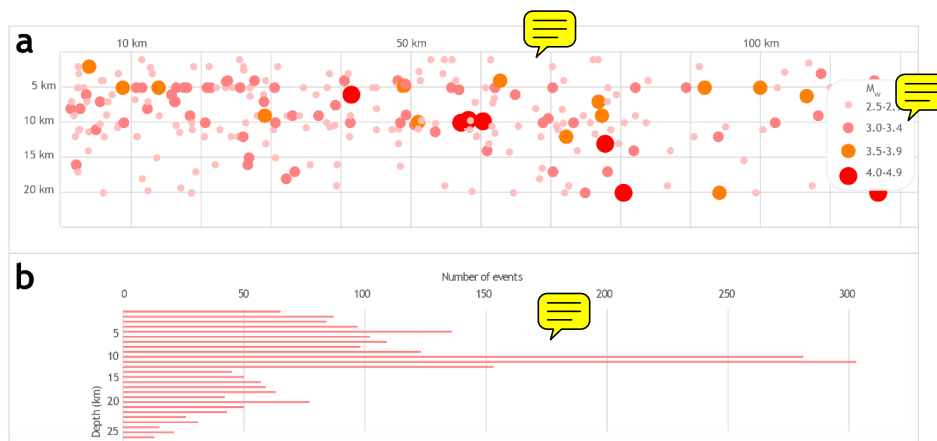

170

171 Fig 2. Seismicity of  $M_w > 2.5$  in the southwestern Valencia Trough shallower than 20  
 172 km since 1950 from the Instituto Geográfico Nacional database (IGN, 2025) a.  
 173 Distribution of the depth of seismicity. Horizontal axis represents distance along the  
 174 southwestern Valencia Trough in a SW-NE direction. b. Depth histogram.





### 175 **3. Methods**

176 The interpretation of the offshore area is based on mainly 2D multichannel seismic  
177 reflection data calibrated with well data (Fig. 3). The central part of the study area is  
178 covered by a high-quality seismic survey acquired by Fugro-Geoteam with the RV  
179 Geo Baltic, processed by Robertson Research International Ltd. in 2002. The survey  
180 consists of 30 seismic sections with an average length of 90 km (totalling  
181 approximately 2,800 km). They are oriented WNW–ESE and NNE–SSW, with  
182 maximum spacings of 13 km and 6 km, respectively. The details regarding the  
183 acquisition and processing parameters can be found in Cameselle & Urgeles (2017).  
184 Most of the area affected by Plio-Quaternary faulting nearer to the coast is covered  
185 only by vintage 2D seismic lines from the late 1970s, acquired by various operators,  
186 which are publicly available upon request in the Instituto Geológico y Minero de  
187 España (IGME-CSIC) (<http://info.igme.es/sigeof/>). More than 100 of these seismic  
188 lines, with a total line length of approximately 2,500 km, were selected for mapping;  
189 although the quality of these lines varies from moderate to poor, the high-density  
190 grid spacing (varying from 1 to 3.5 km) allows fault mapping with reasonable  
191 confidence. The seismic interpretation was performed in two-way travel time (TWT)  
192 by using Move software (by Petex). The seismic dataset was converted to depths  
193 using velocity data derived from Expanded Spread Profile ESP 7 (Pascal et al., 1992;  
194 Torné et al., 1992). A second-order polynomial trend was applied to establish time–  
195 depth relationships, ensuring strong correlation with the well data, similar to the  
196 methodologies of Fang et al. (2021).

197 The interpretation of seismic horizons is calibrated by 9 offshore petroleum  
198 exploration wells, all of which penetrate the entire Neogene section and whose  
199 bottoms are in Mesozoic rocks. Original well reports, log data (lithology, dipmeter,  
200 gamma–ray, sonic and resistivity data) and palaeontological data (from cuttings and  
201 sidewall cores) were retrieved from the IGME-CSIC archive  
202 (<https://info.igme.es/hidrocarburos/>). Well-to-seismic ties were established by  
203 integrating the sonic logs and using synthetic seismograms from end-of-well  
204 reports. Palaeontological analyses and range charts from the original well reports



205 were reviewed and adapted to the Mediterranean biozonation of Lirer et al. (2019) to  
206 obtain approximate absolute ages for the seismic horizons.

207 No seismic data were available for the onshore area of southern Valencia and only  
208 two deep exploration wells were drilled (Jaraco-1 and Perenchiza-1). However,  
209 stratigraphic information is available from 95 hydrogeological wells in the Valencia  
210 coastal plain, as are vertical electric sounding (VES) profiles acquired for  
211 hydrogeological surveys. The data are publicly available in the online IGME-CSIC  
212 databases IRYDA, BD Puntos Agua 2.0 and Sistema de Información Documental  
213 (SID) (accessible through <https://info.igme.es/catalogo/>).

214 In areas with poor seismic coverage, structural mapping was aided by regional  
215 Bouguer gravity anomalies processed with a Butterworth High-pass filter with a 1-  
216 degree cut-off frequency to highlight short-wavelength features of the data (by  
217 Getech, 2015).

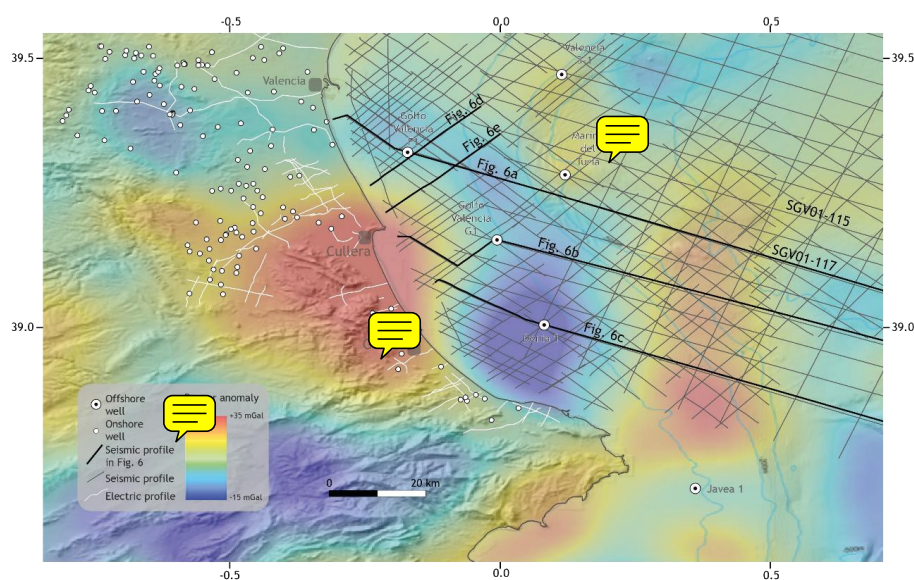

218  
219 Fig. 3. Geophysical dataset used in this work. Filtered Bouguer anomaly data after  
220 Getech (2015). The location is shown in figure 1.

221



#### 222 4. Stratigraphy

223 The general stratigraphic arrangement of the southwestern Valencia Trough (Fig. 4)  
224 consists of a rigid Palaeozoic–Middle Triassic basement overlain by a 1.5–7-km  
225 Upper Triassic–Quaternary stratigraphic cover. Here we present a new detailed  
226 stratigraphic framework for the late Miocene–Quaternary of the southern Valencia  
227 Trough. The definition of the pre-Neogene stratigraphic units presented in this work  
228 is based on mainly previous literature and our analysis of well data, as well as  
229 outcrops in the mainland for the most recent sediments.

230 The Upper Triassic succession (Fig. 4) consists of evaporites, shales and dolomites  
231 (Keuper Facies) (Vargas et al., 2009). The Upper Triassic deposits are overlain by  
232 shallow-water dolomites and anhydrites deposited from the Early to Middle Jurassic  
233 (Salas et al., 2001). The Upper Jurassic and Lower Cretaceous successions are  
234 represented by platform carbonates that grade to marls basinwards and are overlain  
235 by middle–late Albian to Late Cretaceous carbonates. The top of the Mesozoic  
236 succession corresponds to an erosive, angular unconformity that is directly overlain  
237 by Neogene deposits. Cenozoic infilling has been broadly studied in recent decades  
238 (e.g., Arche et al., 2010; Clavell and Berástegui, 1991; Maillard et al., 1992; Ribó et  
239 al., 2016b, 2016a; Soler et al., 1983). The succession starts with a transition from  
240 continental clastic sediments to marine platform carbonates, ending with a deposit  
241 formed by progradational terrigenous shelf-talus sediments (Clavell and  
242 Berástegui, 1991; Etheve et al., 2018; Lanaja, 1987; Roca and Desegaulx, 1992;  
243 Soler et al., 1986).

244 The Neogene succession onshore of the southwestern Valencia Trough (Fig. 4)  
245 mostly consists of middle–late Miocene continental to marginal marine deposits. In  
246 the offshore part of the study area, the Miocene stratigraphic succession is entirely  
247 marine. The base of the Miocene sequence is composed of a basal conglomerate  
248 overlain by coralline algal limestones. The middle Miocene (late Langhian–  
249 Serravallian) deep marine calcareous claystones, marls and fine-grained  
250 sandstones overlie the algal limestones or rest directly on deeply eroded Mesozoic  
251 rocks. Within the southern and central parts of the study area, the early–middle  
252 Miocene sequence is no more than 200 m thick. Towards the north, the middle

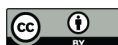

253 Miocene interval rapidly thickens, reaching almost 2000 m. Tortonian and Messinian  
254 deposits consist of mainly marls with thicknesses varying between 180 m and 425  
255 m. The top of the Tortonian–Messinian series is an erosional unconformity  
256 (Messinian Erosion Surface (MES)) (Stampfli & Höcker, 1989; Lofi et al., 2011;  
257 Cameselle et al., 2014).

258 In the onshore and nearshore areas, upper Miocene deposits are overlain by thin  
259 cover (generally less than 50 m) of Pleistocene–recent alluvial fans, laterally grading  
260 to lagoonal and beach barrier deposits near the coast. No Pliocene sediments have  
261 been identified in the entire onshore coastal area, except for local karstic cave infills  
262 with mammal remains (Agustí et al., 2011). Below the southern parts of the city of  
263 Valencia, the thickness of Pleistocene–recent deposits abruptly increases. Vertical  
264 electric sounding profiles seem to indicate the presence of several large normal  
265 faults in this area, which have locally dropped the top Miocene surface down to  
266 more than 400 m below sea level. From Cullera southwards, shallow boreholes  
267 encounter Pleistocene to recent interbedded alluvial gravels, brackish lagoon, and  
268 beach barrier deposits. Vertical electric sounding profiles and well correlations  
269 indicate abrupt thickness changes, likely controlled by a complex system of normal  
270 faults in the Mesozoic–middle Miocene basement, ranging from less than 50 m in  
271 offset to more than 200 m towards the coast. Subsidence in the southern Valencian  
272 coastal area continues to the present day, as evidenced by well-documented  
273 submerged beach barriers of Tyrrhenian age (Eemian interglacial, 127–106ky),  
274 which are currently found between 10 and 40 m below sea level in shallow offshore  
275 areas (Zazo et al, 1979; Alcántara-Carrió et al, 2012).

276 In the offshore area, Pliocene–recent sediments form a large prograding shelf  
277 complex with prominent clinoforms visible in seismic data, which downlap onto the  
278 MES. Prominent undulations on slope foresets are visible on most seismic lines and  
279 are interpreted as sediment waves (Ribó et al., 2015). In the offshore wells, the  
280 stratigraphic succession consists of an overall shallowing-upward series of thick  
281 grey claystones with calcareous interbeds at the base, grading upwards into  
282 sandstones and shell beds at the top. No unconformities have been identified in the



entire sequence, except for erosional gullies and canyons at the shelf edge. The Plio-Quaternary sequence reaches a maximum thickness of approximately 3000 m.

To determine the Plio-Quaternary depositional history and slip rate of major faults, six seismic horizons have been mapped and dated with palaeontological data from offshore wells, via the biostratigraphic scheme of Lirer et al. (2019). Starting from the Messinian unconformity at 5.3 Ma, seismic markers have been dated at 3.8 Ma (LO of *G. margaritae*), 3.3 Ma (FO *G. bononiensis*), 2.6 Ma (LCO *G. obliquus*) and 2.0 Ma (FO *G. truncatulinoides*). As no samples were collected from any of the offshore wells above the lower-middle Pleistocene interval, an additional marker (approximately 1.0 Ma) has been picked halfway through the 2.0 Ma marker and seabed (0 Ma), assuming a constant sedimentation rate.

Isopach maps (Fig. 5) were produced for the intervals of Pliocene (MES to 2.6 Ma marker) and Pleistocene–recent (2.6 Ma marker to the seabed), revealing a significant shift in the location of the depocenter. The Pliocene depocentre is located very close to the southern coast near Denia, attaining a maximum thickness of approximately 1500 m, whereas the Pleistocene depocentre has prograded ca. 20 km to the NNW, reaching a thickness of more than 1750 m. The western shoreward edge of both the Pliocene and Pleistocene depocentres is controlled by very large NNW–SSE-trending normal faults (see below).

The described stratigraphic architecture indicates significant mechanical layering in the southwestern Valencia Trough. A rigid basement is overlain by a mechanically weak layer represented by the Upper Triassic Keuper Facies. Above this interval, a rigid Mesozoic carbonate succession is present, followed by a semirigid layer composed of primarily detrital deposits.

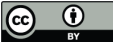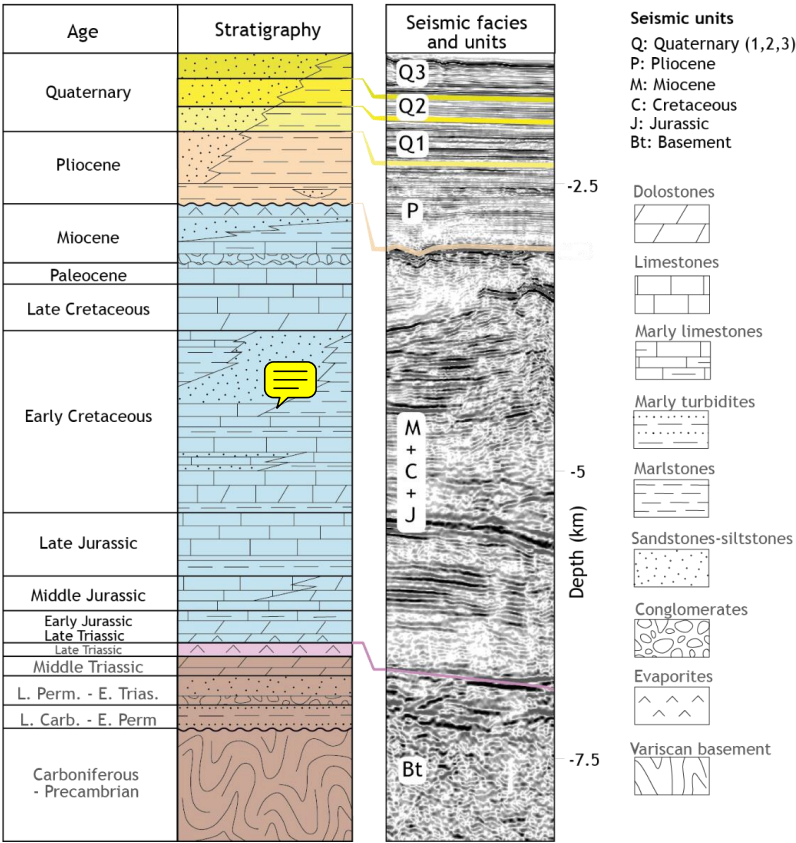

Figure 4: Chronostratigraphic diagram of the southwestern Valencia Trough.

Note that the depth scale shows maximum thicknesses of units.



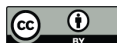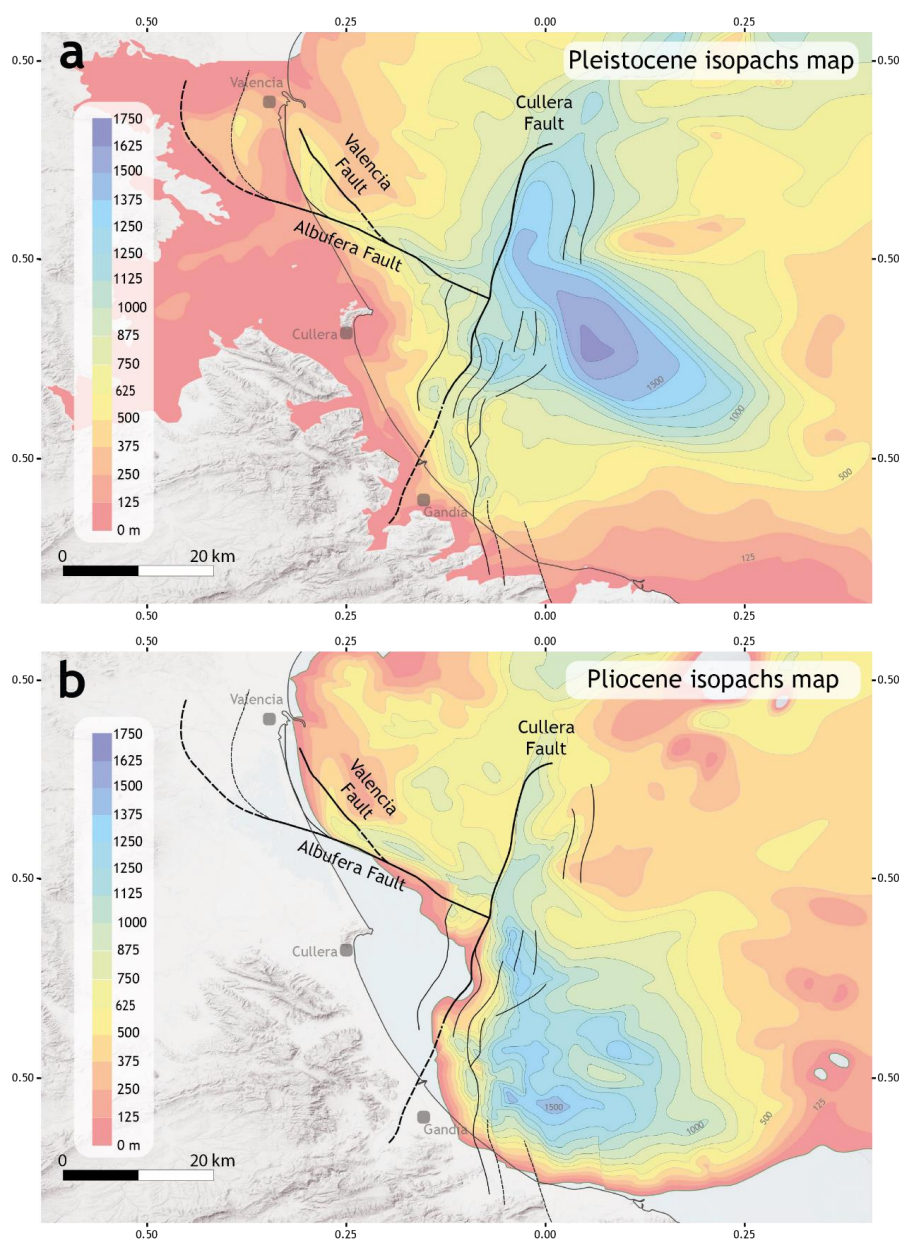

311

312 Figure 5. Isopach maps of the southwestern Valencia Trough for the Pleistocene (a)

313 and Pliocene (b). The traces of the active faults are also depicted. Fault traces

314 represent the horizontal projection of the direction line of the fault plane, located

315 midway between the intersection line of the top-of-the-Pliocene horizon and the

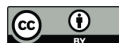

316 top-of-the-Quaternary horizon. Fault traces are derived primarily from their position  
317 on seismic profiles, supplemented by isopach maps and observed thickness  
318 variations in stratigraphic units, as indicated by the available wells. Dashed lines  
319 show interpreted traces. Modified from Ramos et al. (2025).





## 320 **5. Main active faults in the southwestern Valencia Trough**

321 In this section, we describe the main structural features of the southwestern  
322 Valencia Trough after the analysis of gravity data and isopach maps obtained from  
323 the subsurface dataset (seismic lines, wells and VES) (Figs. 3 and 5).

324 The filtered Bouguer anomaly map (Fig. 3) reveals a positive anomaly in the central  
325 part of the study area, referred to as the Cullera anomaly. This positive anomaly is  
326 surrounded by a region exhibiting a negative anomaly, particularly in the offshore  
327 area located east of Cullera. We interpret this pattern of anomaly to be because of  
328 mass excess associated with a basement high (Cullera positive anomaly)  
329 surrounded by a region with greater sedimentary cover (negative anomaly). This  
330 interpretation is further supported by the isopach maps derived from interpretation  
331 of the subsurface data (Fig. 5). The negative gravity anomaly correlates with an  
332 abrupt increase in the thickness of both the Pliocene and Quaternary sedimentary  
333 successions. Furthermore, the transitions in both the gravity anomaly and  
334 sedimentary thickness correspond to the positions of the main faults observed in  
335 the seismic dataset (see below). On the basis of this evidence, we propose that the  
336 southwestern Valencia Trough is structurally characterised by the presence of three  
337 major faults offsetting the basement and significantly influencing the stratigraphic  
338 evolution of the area. These three major faults are: the Cullera Fault, the Valencia  
339 Fault and the Albufera Fault (Fig. 5).

340 The structural configuration of the southwestern Valencia Trough is also influenced  
341 by the presence of Upper Triassic evaporites and shales at the base of the Mesozoic  
342 sedimentary cover. This mechanically weak layer induces tectonic decoupling  
343 within the seismogenic crust of the southwestern Valencia Trough. As a result, the  
344 deformation style of the suprasalt succession (cover) differs significantly from that  
345 of the subsalt succession (basement) (Etheve et al., 2018; Fang et al., 2021; Ramos  
346 et al., 2023, 2025; Roma et al., 2018).

347 The analysis of the seismic reflection profiles (Fig. 6) reveals three distinct fault  
348 types: i) faults restricted to the subsalt basement; ii) faults restricted to the



349 suprasalt cover; and iii) faults cutting through the sedimentary cover, basement and  
350 salt layer.

351

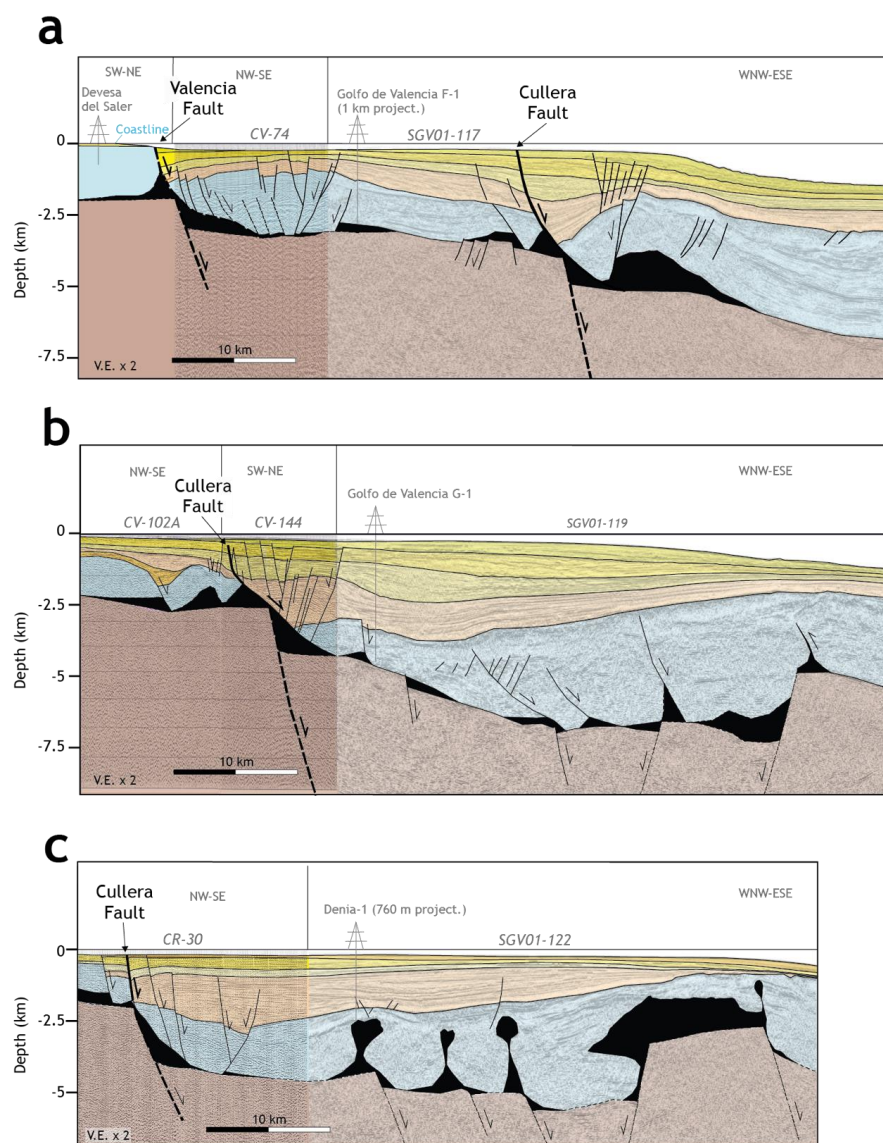

352

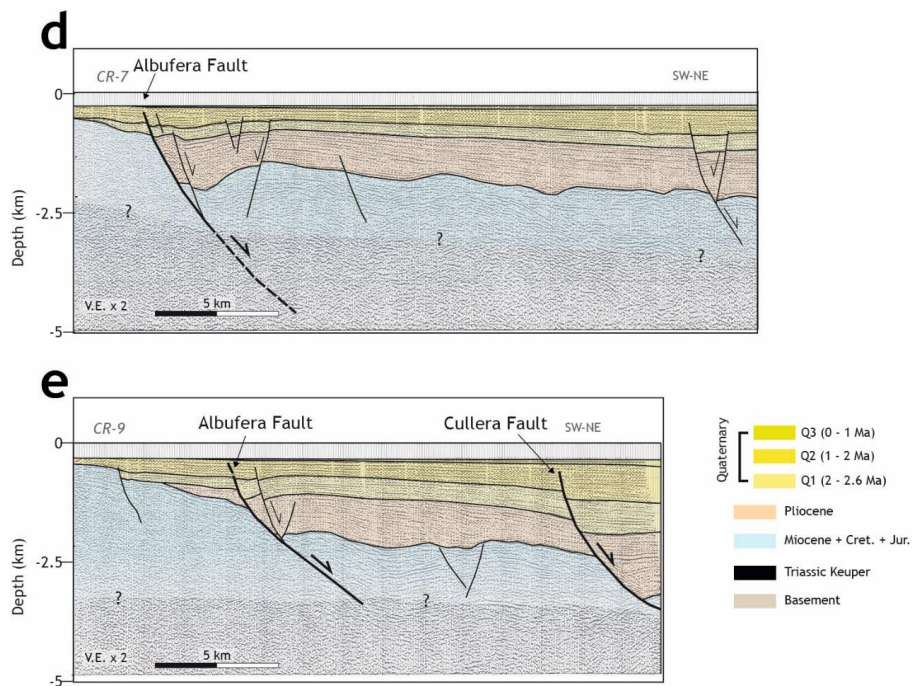

353

354 Fig. 6. Interpreted sections derived from onshore cross-sections (a) and the offshore  
355 2D seismic profiles (a-e). See Fig. 3 for the location. a-c sections after Ramos et al.,  
356 2025.

357

### 358 5.1 Cullera Fault

359 The Cullera Fault is the longest along-strike fault in the region, spans approximately  
360 59 km, and has the highest cumulative offset, with more than 1800 m of vertical  
361 displacement at the top of the Messinian horizon (Figs. 5 and 6).

362 The along-section geometry of the fault across the suprasalt succession is well  
363 imaged in the seismic reflection dataset (Fig. 6). The Cullera Fault is a normal, NNE–  
364 SSW-trending fault that dips highly towards the east. The fault offsets the entire  
365 suprasalt cover, including the 1 Ma horizon. Owing to the low resolution of the  
366 available bathymetric data, it is not possible to confirm whether the fault offsets the  
367 seafloor. The Cullera Fault displaces the top of the basement horizon, indicating  
368 that this fault involves both subsalt and suprasalt successions.



369 Within the basement, the Cullera Fault is poorly imaged in seismic profiles.  
370 Nevertheless, the available data suggest that it is a planar fault (Fig. 6). This is also  
371 supported by the absence of significant tilting of the basement-top horizon.

372 In contrast, the geometry of the Cullera Fault in the sedimentary cover is  
373 heterogeneous. In the northern area (Fig. 6), the part of the Cullera Fault offsetting  
374 the cover exhibits a listric geometry, which is responsible for the development of a  
375 rollover structure in the hanging wall (Fig. 6). This listric geometry consists of a highly  
376 dipping (50–60°) upper part offsetting the Plio-Quaternary succession and a gently  
377 dipping (20–30°) lower part in the Mesozoic cover. Southwards, the listric geometry  
378 and related rollover fold becomes less pronounced (Fig. 6).

379 To better constrain the geometry of the Cullera Fault, we constructed a structural  
380 map of the fault by integrating fault traces identified in the seismic reflection dataset  
381 with isopach maps (Fig. 7). Additionally, a 3D model of the Cullera Fault, along with  
382 the two other major faults, was generated following a 2½D construction approach,  
383 integrating interpreted seismic profiles via interpolation. We employed the ordinary  
384 kriging algorithm implemented in MOVE software, a methodology consistent with  
385 previous approaches applied to analogous structures (Ramos et al., 2020), ensuring  
386 a geologically consistent representation of the fault geometry in the subsurface.  
387 This approach allows for the reconstruction of complex fault surfaces by integrating  
388 available geophysical data while minimising spatial uncertainties. Analysis of the  
389 reconstructed 3D fault indicates that the surface area of the Cullera Fault offsetting  
390 the sedimentary cover is approximately 360 km<sup>2</sup>.

391

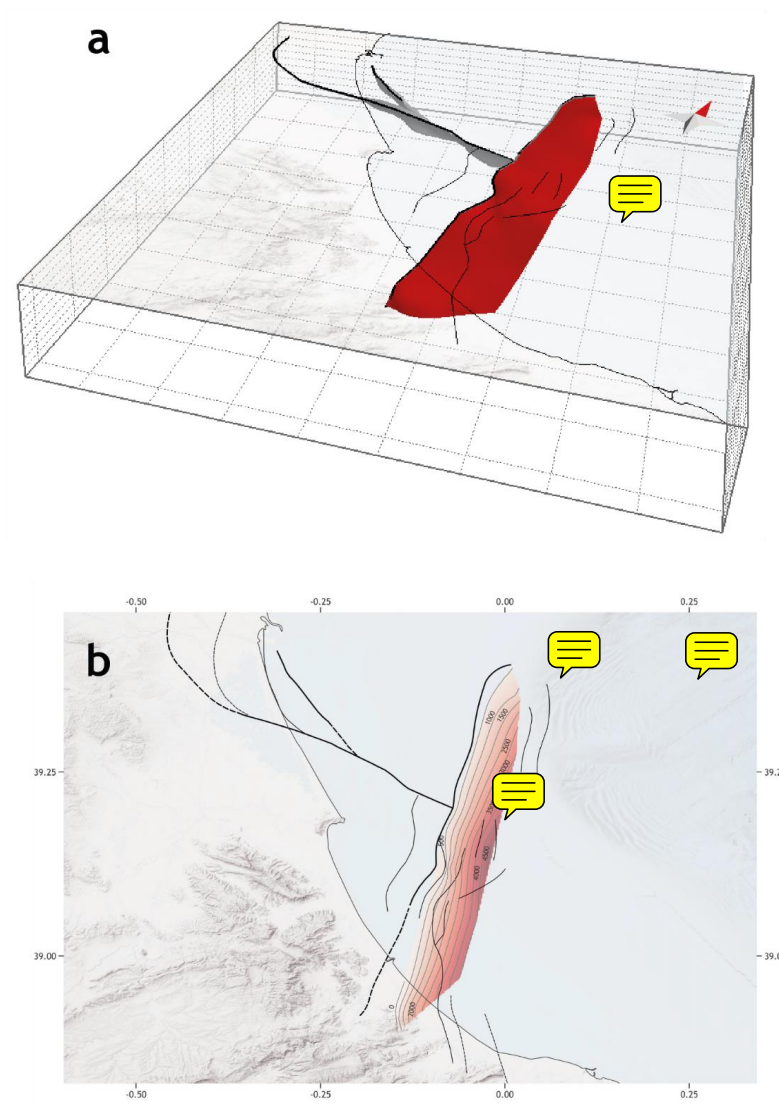

392

393 Figure 7. 3D model (a) and structural map (b) of the Cullera Fault (red surface).  
 394 Squares in figure a represent 10 km x 10 km. Note the red arrow pointing to the North  
 395 in figure a.

396

397 Several minor normal faults have developed in the hanging wall of the Cullera Fault  
 398 (Figs. 5). These faults displace only the suprasalt succession without affecting the



399 underlying subsalt units. In previous studies (e.g., Perea 2006; Roca 1992) distinct  
400 names were assigned to these faults, such as the Western Cabo Cullera Fault,  
401 Central Cabo Cullera Fault, and Eastern Cabo Cullera Fault. However, the improved  
402 resolution and quality of the new seismic dataset enable a more detailed  
403 characterisation of these tectonic structures, allowing for a reassessment of their  
404 nomenclature and role. On the basis of our analysis, we interpret these minor faults  
405 to be part of the damage zone associated with the main Cullera Fault. Fault damage  
406 zones typically consist of subsidiary structures that develop in response to the  
407 distribution of strain surrounding a major fault. In this context, these minor faults  
408 represent secondary features that contribute to the overall deformation but are  
409 structurally subordinate to the Cullera Fault. Consequently, we propose  
410 consolidating the nomenclature to avoid potential confusion. Instead of assigning  
411 separate names to these subsidiary faults, we retain the term Cullera Fault  
412 exclusively for the main structure.

413 The quality of the seismic dataset in profiles GV-102A and SGV-117 (Fig. 3) allows for  
414 an analysis of the slip rate of the Cullera Fault. This analysis is approximate,  
415 because of the resolution of the seismic profiles, the uncertainties in the recognition  
416 of the markers in the hanging wall and footwall, and the age of these markers. Net  
417 slip rates were obtained for the Top-Messinian, Top Pliocene, Top-Q1, and Top-Q2  
418 horizons, with assigned ages of 5.3 Ma, 2.6 Ma, 2 Ma, and 1 Ma, respectively.  
419 Analogous values of the slip rate for each of these markers were obtained from the  
420 two analysed seismic profiles (Fig. 8). The slip rates for the Cullera Fault seem to  
421 have decreased over time, as the calculation yielded mean slip rates of  $0.40 \pm 0.1$   
422 mm/y for the Pliocene and  $0.15 \pm 0.1$  mm/y for the Quaternary. However, we cannot  
423 dismiss that this apparent in-time evolution could be an artefact related to the  
424 epistemic uncertainties mentioned above.



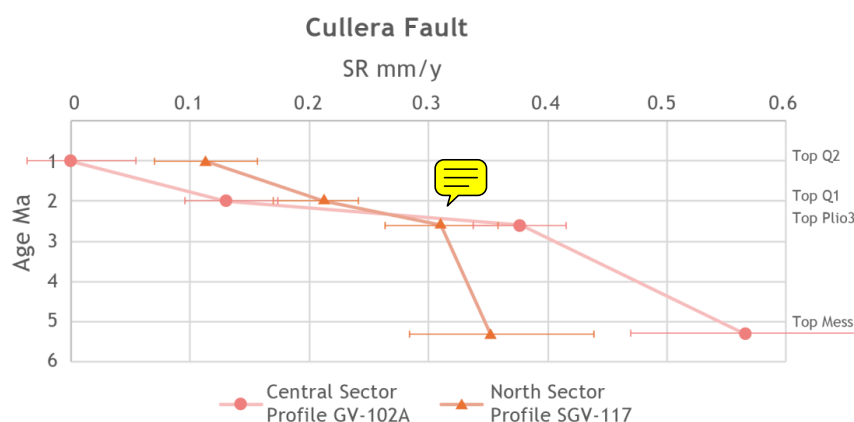

425

426 Figure 8. Long term slip rates (SR) for the Cullera Fault derived from the seismic  
 427 profiles for the Top Messinian, Top Plio3, Top Q1, and Top Q2 horizons. Pink line and  
 428 dots represent SR for the central sector of the fault. Orange line and triangles  
 429 indicate SR for the north sector of the fault. Slip rates seem to decrease in time, from  
 430  $0.40 \pm 0.1$  mm/y for the Pliocene to  $0.15 \pm 0.1$  mm/y for the Quaternary. Error bars  
 431 are estimated on the basis of uncertainties in the recognition of the markers and  
 432 their ages.

433

## 434 5.2. Albufera Fault

435 The Albufera Fault (F3) (Figs. 5 and 6) is a newly defined active structure in the  
 436 southwestern Valencia Trough. This NW–SE striking fault extends approximately 55  
 437 km and exhibits a maximum normal offset of 1000 m for the Top-Messinian horizon.  
 438 This would imply a long-term slip rate of  $0.2 \pm 0.1$  mm/y. The fault offsets both the  
 439 supra- and subsalt successions (Figs. 5 and 6). The Albufera Fault is visible only in  
 440 the vintage seismic reflection dataset, where it presents a low dip and a listric  
 441 geometry.

442 The Albufera Fault appears to offset the entire suprasalt cover, including the 1 Ma  
 443 horizon. As with other faults in the region, the low resolution of the available  
 444 bathymetric data prevents us from determining whether this fault offsets the  
 445 seabed. Nevertheless, high-resolution seismic profiles from the offshore shelf  
 446 analysed by previous authors indicate seabed offsets caused by secondary normal



447 faults likely associated with the Albufera Fault (Díaz de Río et al., 1986; Albarracín  
448 et al., 2013).

449 The available seismic dataset reveals a normal kinematic component for the  
450 Albufera Fault. However, mapping of small-scale fault traces in upper Pleistocene–  
451 recent sediments (interval between the seabed and the 1.8 Ma horizon) reveals that  
452 these faults are oblique to the main trend of the Albufera Fault, forming an en  
453 echelon pattern in map view, which suggests that the Plio-Quaternary reactivation  
454 of the main fault has a significant right-lateral strike-slip component. This dextral  
455 component along the NW–SE trending fault is consistent with the regional ENE–  
456 WSW direction of Plio-Quaternary extension in the southwestern Valencia Trough  
457 and kinematically consistent with NNW–SSE trending normal faults. The fault  
458 influences the Plio-Quaternary sedimentary infill of the southwestern Valencia  
459 Trough (Fig. 5). The computed isopach maps reveal that the Pliocene succession  
460 significantly increased in the hanging wall relative to the footwall. Similarly, the  
461 Quaternary succession is thicker in the hanging wall than in the footwall. The listric  
462 geometry of the Albufera Fault is responsible for the development of a rollover  
463 anticline in the hanging wall (Fig. 6). This anticline is likely accentuated by the  
464 palaeoshelf edge of the late Tortonian–early Messinian shelf, which is located in the  
465 central part of the rollover structure.

466 To further constrain the geometry of the Albufera Fault, a structural map of the  
467 fault was constructed (Fig. 9). Analysis of the reconstructed 3D fault surface  
468 indicates that the fault encompasses an area of approximately 560 km<sup>2</sup>. 





**a**

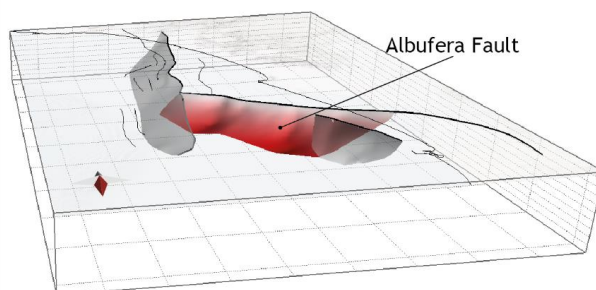

**b**

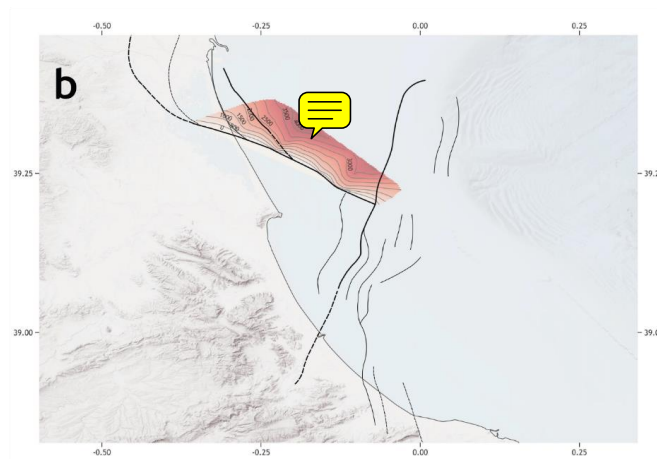

**c**

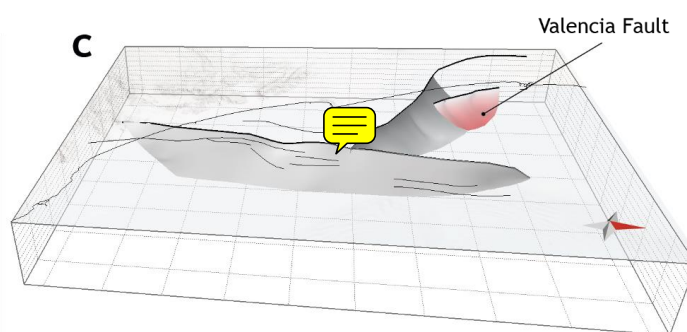

469

470

471

472

473

474

475

476

477

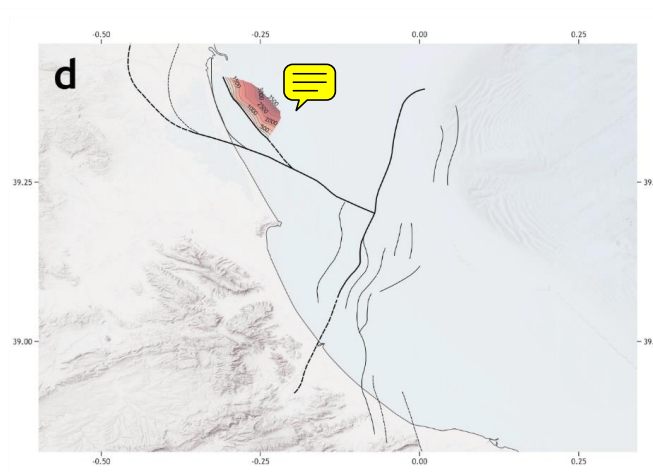

478

479 Figure 9. 3D model and structural map of the Albufera Fault (a and b) and the  
480 Valencia Fault (c and d). Squares in 3D models represent 10 km x 10 km. Note the  
481 red arrow pointing to the North in figures a and c.

482

483

### 484 5.3 Valencia Fault

485 In this section, we define ~~for the first time~~ the Valencia Fault (Figs. 5 and 6). This  
486 structure is considered one of the main active faults in the southwestern Valencia  
487 Trough because of its length of approximately 20 km and its significant impact on  
488 the distribution of Quaternary depocentres. The Valencia Fault displaces both the  
489 supra- and subsalt successions (see below) (Figs. 5 and 6).

490 This NNW–SSE trending, steeply dipping fault is imaged primarily in the vintage  
491 seismic reflection dataset, where it exhibits a listric geometry, at least in the portion  
492 offsetting the suprasalt succession (Fig. 6). The Valencia Fault offsets the entire  
493 suprasalt cover, including the 1 Ma horizon. However, owing to the low resolution of  
494 the available bathymetric data, it is not possible to determine whether this fault  
495 offsets the seabed. The Valencia Fault also displaces the top of the basement  
496 horizon, indicating that this structure involves both subsalt and suprasalt  
497 successions. Within the basement, the Valencia Fault is not well-imaged in the



498 seismic profiles, but the absence of tilting in the basement-top horizon suggests  
499 that it is a planar fault (Fig. 6). The Valencia Fault and its secondary strands very  
500 likely continue onshore below the City of Valencia. The lack of onshore seismic data  
501 hampers the mapping of these fault strands, but their presence can be inferred from  
502 the abrupt Plio-Quaternary thickness changes observed in water wells and Vertical  
503 Electric Sounding profiles.

504 To further constrain the geometry of the Valencia Fault, a structural map of the fault  
505 was constructed (Fig. 9). Analysis of the reconstructed 3D fault surface indicates  
506 that the fault encompasses an area of approximately 208 km<sup>2</sup>.

507



508 **6. Evolutionary growth of the Cullera Fault: interplay between tectonics and**  
509 **salt withdrawal.**

510 This section aims to provide further insights into the evolution of the active faults in  
511 the southwestern Valencia Trough. The low resolution of the vintage seismic dataset  
512 limits the ability to perform a detailed analysis only for the Cullera Fault. To analyse  
513 recent along-dip variations in throw, we constructed throw-depth plots (T-z plots)  
514 for the post-Messinian markers (Fig. 10). These plots provide insights into the  
515 evolutionary growth of the fault (Mansfield and Cartwright, 1996; Hongxing and  
516 Anderson, 2007). The quality of the available seismic reflection dataset allows this  
517 analysis to be performed on two seismic profiles located in the northern part of the  
518 fault, where the listric geometry is well-developed (LINES SGV01-115 and SGV01-  
519 117; Fig. 6).

520 We computed T-z plots for six suprasalt horizons: Top-Messinian, Top Plio1, Top  
521 Plio2, Top Plio3, Top Q1, and Top Q2 (Fig. 10). The T-z plots for the Cullera Fault reveal  
522 a general increase in the throw and throw gradient with depth. However, the data  
523 indicate two distinct portions with differing throw gradients: (i) the lower portion,  
524 with higher throw gradients, includes horizons from the Top Messinian to the Top  
525 Pliocene; (ii) the upper portion, with lower throw gradients, comprises the  
526 Quaternary horizons. This distinction between these two portions is particularly  
527 pronounced in the southern seismic line (line SGV01-117, Fig. 6). Here, the throw  
528 gradient decreases, from 2.38-2.98 in the lower portion to 0.22-0.10 in the upper  
529 portion.

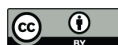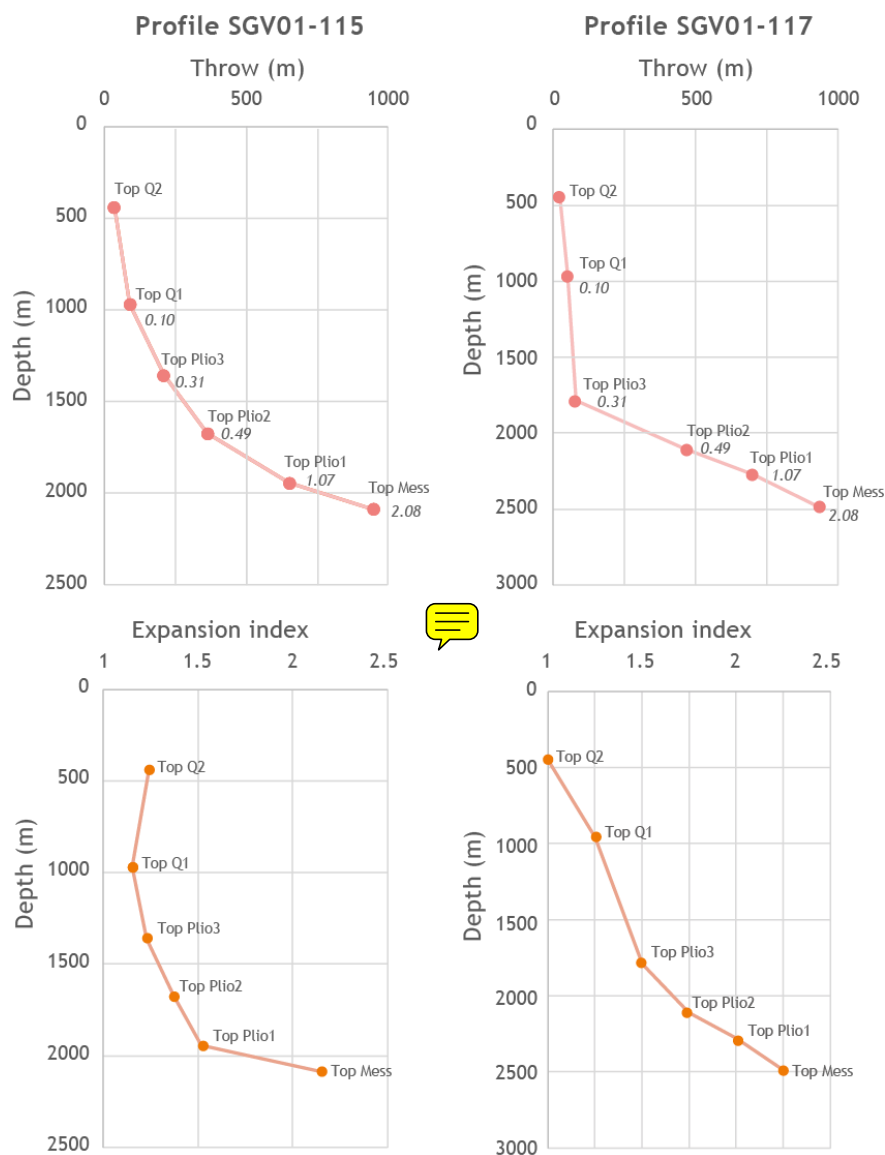

530

531 Figure 10. Throw depth (T-z) and expansion index plots for the Cullera Fault  
 532 computed from profiles SGV01-115 and SGV01-117. The numbers within the T-z  
 533 plots indicate the throw gradient for the corresponding interval. The T-z plots reveal  
 534 an increase in the throw and throw gradient, with a higher throw gradient for the Top  
 535 Messinian–Top Pliocene interval and a lower throw gradient for the Quaternary  
 536 interval.

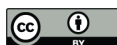

537 The Cullera Fault significantly influences the Plio-Quaternary sedimentary infill of  
538 the southwestern Valencia Trough. Isopach maps indicate a marked increase in the  
539 thickness of both Pliocene and Quaternary successions in the hanging wall with  
540 respect to the footwall (Fig. 5). This thickness variation offers critical insights into  
541 the history of fault growth. To quantify this relationship, we computed the expansion  
542 index (Thorsen, 1963; Rouby et al., 2003; Jackson and Rotevatn, 2013) for the post-  
543 Messinian stratigraphic units (Fig. 10). The expansion index consistently exceeds 1  
544 across all the analysed intervals, indicating a synkinematic deposition in these  
545 units. Notably, the Pliocene units exhibit a greater expansion index than the  
546 Quaternary units do, with the difference being particularly pronounced in the  
547 southern seismic line (Fig. 6 LINE SGV01-117).

548 Finally, to shed light on the mechanisms controlling the creation of accommodation  
549 space related to the Cullera Fault, we analyse the tectonic–stratigraphic  
550 arrangement of the hanging wall units. In the northern part of the Cullera Fault,  
551 where the rollover structure is well developed (Fig. 6), the position of the Plio-  
552 Quaternary depocenter in the hanging-wall varies along the dipdirection. The  
553 Pliocene depocentre remains in the immediate hanging wall of the fault. However,  
554 during the deposition of unit Q1, the depocentre migrated basinwards. The  
555 depocentre of unit Q2 is located adjacent to the fault, whereas the depocentre of  
556 unit Q3 is located further east, related to the progradational geometry of the  
557 sedimentary bodies. Nevertheless, when focusing strictly on the area affected by  
558 the fault, the local Q3 depocentre also remains adjacent to the fault.

559 Analogous stratigraphic geometries have been observed in the Danish North Sea,  
560 where they have been interpreted in terms of the evolution of a salt-influenced fault  
561 (Duffy et al., 2023 and references therein). In such a setting, two mechanisms create  
562 accommodation space: fault displacement and load-driven salt withdrawal in the  
563 hanging-wall. These two mechanisms can act separately or contemporaneously in  
564 time. When the accommodation space generated by the fault offset exceeds that  
565 created by salt withdrawal, the depocentre axis remains adjacent to the fault. In  
566 contrast, when salt-related accommodation space is dominant, the depocentre  
567 migrates away from the fault (Duffy et al., 2023).



568 Accordingly, we interpret that, during the Pliocene, the accommodation space  
569 generated by the displacement of the Cullera Fault exceeded that produced by the  
570 accommodation space related to salt withdrawal, as evidenced by the depocentre's  
571 axis being located adjacent to the fault (Fig. 6). During the deposition of unit Q1, the  
572 depocentre migrated basinwards, suggesting that salt withdrawal-related  
573 accommodation space outpaced that related to fault displacement. Finally, during  
574 Q2 and Q3, the depocentre axis shifted towards the fault, indicating that fault  
575 displacement-related accommodation space regained dominance over salt  
576 mobility.

577 All the above-described features shed light on the evolution of the salt-influenced  
578 Cullera Fault. As previously discussed, the creation of accommodation space  
579 results from two mechanisms: tectonic offset along the fault and displacement  
580 related to salt withdrawal. Both mechanisms act cumulatively; that is, both  
581 mechanisms produce slip along the Cullera Fault and create accommodation  
582 space. The migration of successive depocentres suggests that, during the Pliocene,  
583 accommodation space related to tectonic offset was greater than that created by  
584 salt withdrawal. As, the throw gradient is high ( $\approx 2.4$ ) during this period, we postulate  
585 that both mechanisms were active. During the deposition of Q1 (2.6–2 Ma), the  
586 position of the depocentre suggests that salt mobility became the dominant  
587 mechanism, likely due to a decrease in fault activity, an increase in salt withdrawal,  
588 or both. As the throw gradient decreases during this period, we postulate that a  
589 decrease in the fault displacement rate could be the reason for the change in the  
590 main mechanism. Finally, during the rest of the Quaternary (2 Ma to present), fault  
591 displacement-related accommodation space once again exceeded that created by  
592 salt withdrawal. The constant throw gradient observed during this period with  
593 respect to the previous time interval (2.6–2 Ma) suggests that the change in the main  
594 mechanism was due to a reduction in or cessation of salt withdrawal. This  
595 interpretation is further supported by the off-fault geometry of the Q2–Q3  
596 sedimentary bodies, as no significant change in thickness is observed above the salt  
597 withdrawal-related anticlinal crest located east of the Cullera Fault (Fig. 6).  
598 Therefore, the evolution of the Cullera Fault during the Pliocene–Quaternary time



599 span was controlled mainly by the tectonic offset, except for the time interval

600 between 2.6 and 2 Ma, when offset was related mainly to salt withdrawal.

601





602 **7. Influence of mechanical layering on the seismic potential: the case of the**  
603 **southwestern Valencia Trough**

604 The southwestern Valencia Trough has a distinct mechanical stratigraphy  
605 characterised by a subsalt basement and a suprasalt Mesozoic–Quaternary  
606 sedimentary succession. These two units are separated by a **weak mechanical layer**  
607 composed of Triassic evaporites. **These lithologies** are well documented for their  
608 ductile behaviour, which enables them to act as regional detachment layers (e.g.,  
609 Morley et al., 2003; Jackson and Hudec, 2005) and inhibits the propagation of faults  
610 (e.g., Withjack et al., 1990; Pascoe et al., 1999; Maurin and Nivière, 2000; Withjack  
611 and Callaway, 2000; Richardson et al., 2005; Ford et al., 2007; Kane et al., 2010;  
612 Marsh et al., 2010). Moreover, mechanically weak layers have been shown to induce  
613 full or partial geometric and kinematic decoupling between sub- and  
614 supradetachment successions (e.g., Stewart et al., 1997; Withjack and Callaway,  
615 2000; Ford et al., 2007; Tvedt et al. 2013). In this section, we focus on the  
616 implications of this mechanical arrangement in terms of the seismic potential of  
617 salt-influenced active faults.

618 In an active region, tectonics are generally the main driving mechanism of fault  
619 displacement. However, in the case of salt-influenced faults, displacement can  
620 also result from salt withdrawal. Our analysis of the evolution of the Cullera Fault  
621 presented in the previous section indicates that the fault offset is related to the  
622 interplay between two mechanisms: tectonic offset along the fault and  
623 displacement related to salt withdrawal. Our analysis also reveals how these two  
624 processes interact with each other. Consequently, in areas with salt-influenced  
625 faults, seismicity can potentially be produced from either mechanism or a  
626 combination of both.

627 In terms of seismic potential, there is a significant difference between a tectonic  
628 earthquake and a salt-withdrawal earthquake. This difference lies in the maximum  
629 potential thickness of the seismogenic layer involved in the rupture. A tectonically  
630 driven earthquake could theoretically rupture the entire seismogenic crust. **In**  
631 **contrast, a salt withdrawal-related earthquake would imply offset restricted to the**  
632 **suprasalt succession.** Therefore, in an earthquake restricted to the suprasalt



633 succession, the thickness of the seismogenic layer is limited by the depth of the  
634 mechanically weak layer, reducing the maximum potential rupture area and,  
635 consequently, the seismic potential. A salt-withdrawal-related earthquake could  
636 induce a vertical stress drop related to salt displacement, potentially triggering  
637 displacement in the subsalt succession and leading to a complex rupture. However,  
638 in terms of seismic potential, such a hypothetical earthquake would not differ from  
639 a tectonically-driven event. Similarly, a tectonically driven earthquake may rupture  
640 only the suprasalt succession.

641 Despite the mechanism driving seismicity the presence of a weak mechanical layer  
642 within the seismogenic crust significantly influences the seismogenic potential of  
643 active faults. We hypothesise that this weak layer could locally hinder the effective  
644 vertical propagation of a rupture, thereby resulting in faults being seismogenically  
645 bonded. Specifically, the total or partial decoupling induced by the weak evaporitic  
646 layer may limit the effective width of the seismogenic layer. This hypothesis is  
647 independent of the weak layer composition; therefore, our hypothesis can be  
648 extended to any region with a similar structural configuration.

649 A widely used approach to characterise the seismic potential of an active fault  
650 involves earthquake fault scaling relationships. These relationships estimate the  
651 seismic parameters of an active fault on the basis of its geometric and/or kinematic  
652 features (Kanamori and Anderson, 1975; Geller, 1976; Wells and Coppersmith;  
653 1994; Stirling et al., 2002 and 2013; Leonard, 2010 and 2014; among many others).  
654 In the case of the southwestern Valencia Trough faults, the available data support  
655 characterisation on the basis of geometric features, such as fault area, length, or  
656 width. However, the mechanical layering observed in the southwestern Valencia  
657 Trough necessitates the cautious application of these scaling relationships. The  
658 influence of the weak mechanical layer introduces complexities that may not be  
659 fully accounted for by traditional scaling methods.

660 Therefore, we begin our analysis by comparing the southwestern Valencia Trough  
661 with the Zagros fold-and-thrust belt. While Zagros fold-and-thrust belt differs  
662 tectonically from the southwestern Valencia Trough, as it is dominated by  
663 shortening rather than extension, it structurally resembles the southwestern



664 Valencia Trough because of its pronounced mechanical layering in the upper crust.  
665 The Zagros fold-and-thrust belt features a crystalline basement overlain by a 10-km-  
666 thick Precambrian–Quaternary sedimentary cover. These two successions are  
667 separated by the Hormuz salt layer (Casciello *et al.*, 2009; Sherkati *et al.*, 2005;  
668 Molinaro *et al.*, 2005). That is, similar to the southwestern Valencia Trough, the  
669 seismogenic crust is characterised by the presence of an intermediate  
670 mechanically weak layer. Seismicity in the Zagros fold-and-thrust belt is  
671 characterised by a general absence of coseismic surface ruptures. This seismicity  
672 nucleates both in the basement and in the cover (Nissen *et al.*, 2011). Notably, the  
673 centroids of most of the larger events (magnitudes exceeding  $M_w$  5), are located at  
674 depths between 4 and 14 km, indicating that seismic activity nucleates both within  
675 the suprasalt succession and in the basement (Nissen *et al.* 2007, 2010; Roustaei  
676 *et al.* 2010). Additionally, very large earthquakes have occurred in the Zagros fold-  
677 and-thrust belt; these earthquakes include the Ghir and Khurgu events ( $M_w=6.7$ ),  
678 which are interpreted as ruptures involving both the basement and the cover,  
679 rupturing through the basement–cover interface (Nissen *et al.*, 2011).

680 We propose that the southwestern Valencia Trough may exhibit a comparable  
681 pattern of seismicity to that of the Zagros fold-and-thrust belt. Specifically, we  
682 hypothesise that seismic events in the southwestern Valencia Trough could have  
683 nucleated within both the basement and the suprasalt succession. Furthermore, we  
684 postulate that larger earthquakes in the southwestern Valencia Trough could also  
685 rupture both mechanical layers. Available centroid data for the southwestern  
686 Valencia Trough suggest that most earthquakes nucleate at depths between 1 and  
687 13 km (Fig. 2). Although these depth estimates carry significant uncertainties, we  
688 interpret this dataset as supporting evidence for our hypothesis that seismicity in  
689 the southwestern Valencia Trough nucleates both in the basement and in the cover.

690 As we mentioned previously, most empirical source-scaling relationships for crustal  
691 earthquakes correlate the moment magnitude ( $M_w$ ) with the fault dimensions  
692 (length, width, and/or area; (Kanamori and Anderson, 1975; Geller, 1976; Wells and  
693 Coppersmith; 1994; Stirling *et al.*, 2022; Leonard, 2010; among many others). We  
694 propose that when these scaling relationships are applied to regions with a weak



695 mechanical layer, the role of this layer should be explicitly considered in the  
696 analysis. This is because the presence of a weak layer can potentially hinder the  
697 effective vertical propagation of a rupture, thereby limiting the effective width of the  
698 seismogenic layer. This consideration is particularly relevant for earthquakes that  
699 nucleate above the weak layer.

700 Several studies suggest that the downdip width of the seismogenic crust (the  
701 thickness of seismogenic crust measured along the fault plane) can constrain the  
702 maximum magnitudes of earthquakes (Hyndman, 2007; Ruff and Kanamori, 1983;  
703 Weng & Yang, 2017). For large-magnitude events involving the entire seismogenic  
704 crust, some scaling relationships account for the constraint on fault-width rupture  
705 growth relative to fault-length rupture growth by incorporating a change in slope in  
706 width-to-length scaling (Leonard, 2010; Yen and Ma, 2011; Leonard, 2014; Cheng et  
707 al., 2019; Huang et al., 2024). This change in slope reflects the width of the  
708 seismogenic crust, which imposes a limit on rupture propagation owing to  
709 variations in the mechanical behaviour of the crust. We propose a similar approach  
710 to evaluate the seismic potential of regions characterised by a weak mechanical  
711 layer within the upper crust, such as the southwestern Valencia Trough.

712 Our approach involves including the rupture aspect ratio when calculating the  
713 geometric parameters of an active fault. Specifically, we propose that, instead of  
714 using the total area or length of the fault as direct inputs to scaling relationships, a  
715 correction factor should be applied to these geometric parameters. This correction  
716 factor is based on the empirical aspect ratio of faults. For example, consider an  
717 earthquake nucleating above a weak mechanical layer. Two potential scenarios for  
718 the propagation of such an earthquake can be envisioned: i) that it propagates  
719 through the basement–cover interface or ii) that it remains restricted to the  
720 succession above the weak layer. In the first scenario, the potential maximum  
721 rupture area can be calculated by multiplying the fault length by the fault width. Any  
722 area-based or length-based scaling relationship can then be applied. This scenario  
723 represents the maximum seismic potential of the fault.

724 In the second scenario, where rupture propagation is restricted to succession above  
725 the weak layer, a simplistic calculation of the fault area would multiply the total fault

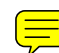



length by the thickness of the ruptured succession (Fig 11). However, since the  
hypothesised rupture offsets only the succession above the mechanically weak  
layer, the width of the rupture is significantly limited. This would result in a highly  
elongated rupture with an unusually high aspect ratio, deviating from commonly  
observed values (Nicol et al., 1996; Stock & Smith, 2000). For this second scenario,  
we propose using the thickness of the ruptured succession as a limiting factor.  
Specifically, the rupture area should be calculated by multiplying the width of the  
fault offset (based on the thickness of the succession above the weak layer and  
corrected by the fault dip) by the total fault length weighted by the aspect ratio (Fig  
11). This weighted area can then be used as input in any area-based scaling  
relationship. We consider that this calculation offers a more realistic estimation of  
the maximum seismogenic potential for events rupturing only the succession above  
the weak layer. Finally, we recommend avoiding length-based scaling relations for  
this second scenario, as such relations implicitly assume a rupture of the entire  
seismogenic crust.

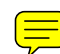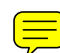

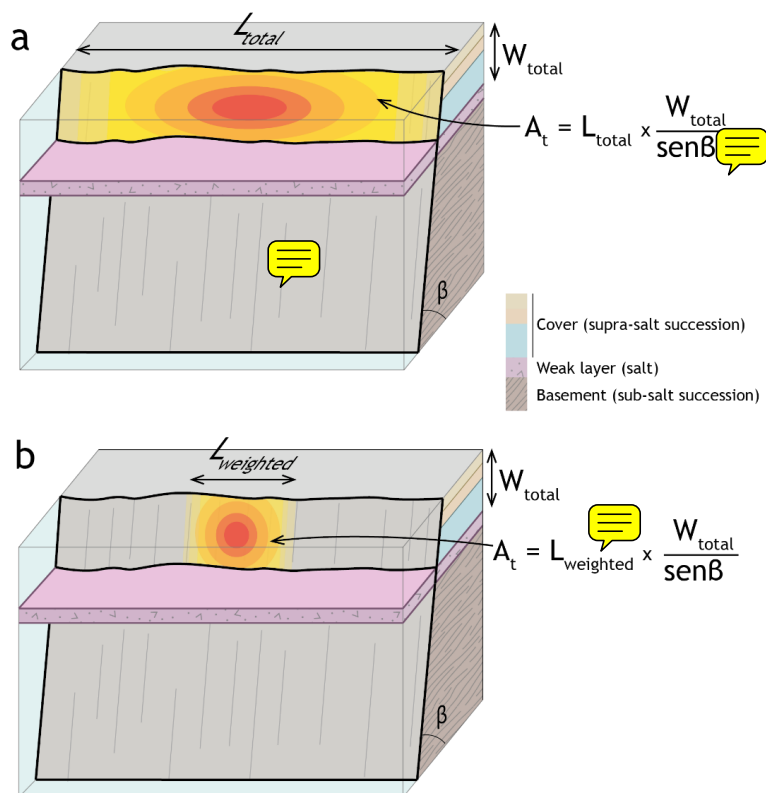

741

742 Figure 11. Conceptual model of the weighted rupture area of an earthquake  
 743 nucleating above the weak mechanical layer. The area of the rupture is  
 744 shown using a red–yellow gradient. An earthquake rupturing the total fault  
 745 length ( $L$ ) and the total thickness ( $W_{total}$ ) above the weak layer would result in  
 746 nonrealistic, highly elongated ruptures. In figure panel b, we propose a more  
 747 realistic case: an earthquake offsetting the total thickness above the weak  
 748 layer ( $W_{total}$ ) and a rupture length weighted by the aspect ratio ( $L_w$ ).

749

750



751 **8. Seismic characterisation of active faults in the southwestern Valencia**  
752 **Trough.**

753 In this section, we compute the seismic potential of the active faults in the  
754 southwestern Valencia Trough by applying several scaling relationships. We perform  
755 two distinct calculations corresponding to the two scenarios described earlier. i) In  
756 the first scenario, we assume a rupture involving both the supra- and subsalt  
757 successions. That is, this first scenario accounts for an earthquake rupturing the  
758 entire seismogenic crust. This scenario provides the maximum seismic potential of  
759 the faults. ii) In the second scenario, we assume that a rupture is restricted to the  
760 suprasalt succession. For this calculation, we apply several area-based scaling  
761 relationships, and we use the area weighted by the aspect ratio as the input  
762 parameter. Since the rupture area involved in this second scenario is relatively  
763 small, a relatively low seismogenic potential is expected.

764

765 *8.1. First scenario: Ruptures involving the entire seismogenic crust.*

766 For both scenarios, we apply the scaling relationships of Wells & Coppersmith  
767 (1994) (values corresponding to normal faults) and Stirling et al. (2002). In the first  
768 scenario, i.e., ruptures involving the entire seismogenic crust, we assume that a  
769 complete fault ruptured from the subsalt basement through the suprasalt  
770 succession. Since the total thickness of the seismogenic crust is not precisely  
771 known, we used the fault length as the primary input parameter for these  
772 calculations (Table 1).

773

774

775 Table 1 Source parameters obtained from scaling relationships (Wells &  
776 Coppersmith, 1994 -WC94- and Stirling et al., 2002 -Stirling02-) assuming ruptures  
777 involving the entire seismogenic crust

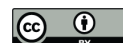

|                | Input parameters | WC94           |               |               | Stirling02     |               |
|----------------|------------------|----------------|---------------|---------------|----------------|---------------|
|                | L km             | M <sub>w</sub> | AD m          | MD m          | M <sub>w</sub> | AD m          |
| Cullera Fault  | 59               | 7.2<br>±0.34   | 1.61<br>±0.37 | 4.94<br>±0.41 | 7.3<br>±0.30   | 2.39<br>±0.24 |
| Albufera Fault | 20               | 6.58<br>±0.34  | 0.42<br>±0.37 | 0.97<br>±0.41 | 6.92<br>±0.30  | 1.97<br>±0.24 |
| Valencia Fault | 40               | 6.97<br>±0.34  | 0.99<br>±0.37 | 2.75<br>±0.41 | 7.16<br>±0.30  | 2.23<br>±0.24 |

778

## 779 8.2. Second scenario: Ruptures involving only the suprasalt succession

780 In this scenario, the presence of a mechanically weak layer within the seismogenic  
781 crust is considered to control the seismic potential of active faults. As discussed  
782 previously, we use the weighted rupture area as the input parameter for the scaling  
783 relationships. The weighting factor is based on the aspect ratio of normal faults. To  
784 provide context for this approach, we also present seismic parameters calculated  
785 from the total fault area offsetting the entire suprasalt succession. The aspect ratios  
786 of normal fault ruptures vary widely (0.4–18); however, most of the observed  
787 ruptures are within the range of 0.5 to 3.5 (Nicol et al., 1996; Stock & Smith, 2000),  
788 with a mode value of 1.8 (30%, Stock & Smith, 2000). Numerical simulations of  
789 strike-slip faults by Weng & Yang (2016) demonstrated that the width of the  
790 seismogenic layer significantly influences the rupture aspect ratios. According to  
791 their findings, a seismogenic layer thickness of approximately 10 km marks a critical  
792 boundary: for thicknesses less than this value, rupture aspect ratios remain low (ca.  
793 2), whereas thicknesses greater than 10 km result in significantly higher aspect  
794 ratios (<8). Considering these findings and given that the suprasalt succession in the  
795 southwestern Valencia Trough has an average thickness of approximately 5 km, we  
796 adopt an aspect ratio of 1.8 for our calculations.



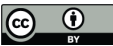

797 In the southwestern Valencia Trough, the suprasalt succession thickness (~5 km)  
798 and an average fault dip of ~45° yield a maximum rupture width of approximately 7.1  
799 km for events confined to the suprasalt succession. For events unrestricted by the  
800 aspect ratio (i.e., earthquakes rupturing the entire fault length and width of the  
801 suprasalt succession), we compute the rupture area as the product of length and  
802 width (L\*W). However, when the seismic potential for ruptures weighted by the  
803 aspect ratio is calculated, the controlling factor is the fault width. As we assume a  
804 constant thickness for the suprasalt succession across southwestern Valencia  
805 Trough, the rupture area and corresponding seismic potential are consistent for all  
806 the faults in this study (Table 2).

807

808 Table 2 Moment magnitude obtained from scaling relationships (Wells &  
809 Coppersmith, 1994 -WC94- and Stirling et al., 2002 -Stirling02-). The first column  
810 (not weighted area) corresponds to the values obtained assuming ruptures involving  
811 the total suprasalt succession. The second column (weighted area) shows the  
812 values obtained using the area weighted by the aspect ratio as input parameter.

|                | Not weighted area                     |                        |                              | Weighted area                         |                        |                              |
|----------------|---------------------------------------|------------------------|------------------------------|---------------------------------------|------------------------|------------------------------|
|                | Input parameters<br>A km <sup>2</sup> | M <sub>w</sub><br>WC94 | M <sub>w</sub><br>Stirling02 | Input parameters<br>A km <sup>2</sup> | M <sub>w</sub><br>WC94 | M <sub>w</sub><br>Stirling02 |
| Cullera Fault  | 511.4                                 | 6.69<br>±0.34          | 7.07 ±0.26                   | 135.2                                 | 6.10<br>±0.34          | 6.65<br>±0.26                |
| Albufera Fault | 346.7                                 | 6.21<br>±0.34          | 6.72 ±0.26                   | 135.2                                 | 6.10<br>±0.34          | 6.65<br>±0.26                |
| Valencia Fault | 173.4                                 | 6.52<br>±0.34          | 6.94 ±0.26                   | 135.2                                 | 6.10<br>±0.34          | 6.65<br>±0.26                |

813



814 The comparison between the standard application of earthquake source scaling  
815 relations and the approach presented here for regions characterised by the  
816 presence of a weak mechanical layer within the seismogenic crust reveals  
817 significant differences (Fig. 12). The maximum expected magnitudes for  
818 characteristic events rupturing the entire seismogenic crust (i.e., propagating  
819 across the basement–cover interface) are estimated to be 7.2–7.3, 6.58–6.92, and  
820 6.97–7.16 for the Cullera, Valencia, and Albufera Faults, respectively. In contrast, for  
821 hypothetical earthquakes restricted to the suprasalt succession and rupturing of  
822 the total length of the faults, the expected magnitudes are lower, ranging from 6.7–  
823 7.1, 6.2–6.7, and 6.5–6.9 for the Cullera, Valencia, and Albufera faults, respectively.  
824 However, in such cases, we argue that the seismic potential derived using area-  
825 weighted relations provides a more realistic estimate. Using this approach, our  
826 calculations yield maximum magnitudes of 6.1–6.7 for all faults. These values are  
827 2–9 % lower than those obtained when accounting for the total suprasalt  
828 succession thickness.

829 When the area-weighted values are compared with the maximum expected  
830 magnitudes for ruptures involving the entire seismogenic crust, the results reveal a  
831 4–15% reduction. This discrepancy highlights the importance of incorporating  
832 mechanical layering into seismic potential assessments in regions where weak  
833 layers influence fault dynamics and rupture propagation. Furthermore, these  
834 differences in seismic potential should be addressed in probabilistic seismic hazard  
835 assessments.

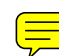

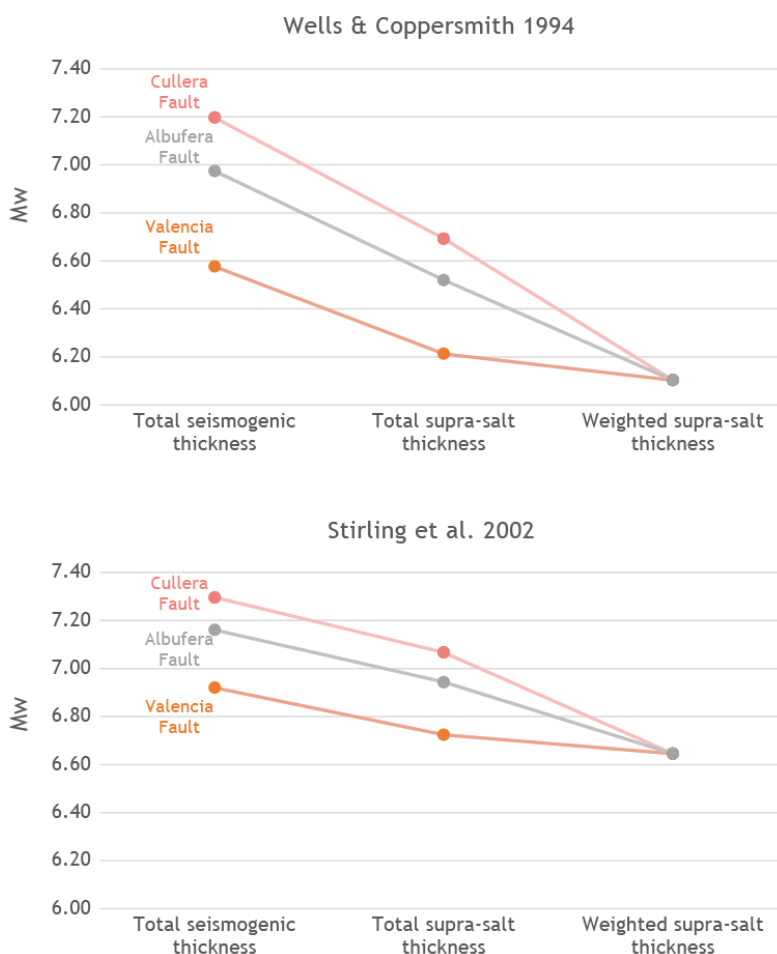

836

837 Figure 12. Plots of  $M_w$  values for the Cullera, Albufera and Valencia Faults obtained  
 838 using the scaling relationships of Wells & Coppersmith (1994) and Stirling et al.  
 839 (2002). The plots show the values computed assuming a rupture of the total  
 840 seismogenic thickness, a rupture of the total suprasalt succession, and the values  
 841 assuming a rupture of an area calculated using a suprasalt thickness weighted with  
 842 the aspect ratio.

843



## 844 **9. Conclusions.**

845 Analysis of a comprehensive subsurface dataset from the southwestern Valencia  
846 Trough enables the identification of three major active normal faults: the Cullera,  
847 Albufera and Valencia faults. Among these faults, the Cullera Fault is the main active  
848 structure in this region, with a cumulative offset of 1800 m at the top of the  
849 Messinian marker. The long-term slip rate varies over time between  $0.15 \pm 0.1$  mm/y  
850 and  $0.4 \pm 0.1$  mm/y. The Albufera Fault, which is 55 km in length, has a long-term slip  
851 rate of  $0.2 \pm 0.1$  mm/y, whereas the 20-km-long Valencia Fault significantly  
852 influences the spatial distribution of Quaternary depocentres.

853 Our results also reveal heterogeneous seismogenic crust in the study area, largely  
854 because of a mechanically weak layer, which is composed mainly of Triassic  
855 evaporites. Consequently, two competing mechanisms are responsible for the  
856 offset along the active faults: tectonics and salt withdrawal. A quantitative  
857 evolutionary analysis of the Cullera Fault indicates that tectonics was the dominant  
858 mechanism during the Pliocene, whereas salt withdrawal took precedence in the  
859 early Quaternary (2.6–2 Ma). After 2 Ma, tectonic activity once again became the  
860 primary driver of fault displacement.

861 The mechanically layered crust of the southwestern Valencia Trough influences  
862 seismicity: events may nucleate in either the basement or the suprasalt succession.  
863 Total or partial decoupling related to the mechanically weak layer implies that an  
864 earthquake that nucleated in the suprasalt succession would likely be restricted to  
865 this upper part of the seismogenic crust, yet larger events involving basement and  
866 cover units are also plausible. For reliable seismic hazard assessments, both  
867 scenarios must be accounted for. To compute the seismogenic potential of active  
868 faults under the assumption of rupture within the suprasalt succession, we propose  
869 the use of the rupture aspect ratio as a correction factor for the maximum rupture  
870 area. Specifically, the product of the suprasalt thickness (corrected by the fault dip)  
871 and the fault length—weighted by the aspect ratio—provides a more realistic  
872 approximation of the maximum rupture area. Using this method, the maximum  
873 magnitudes for suprasalt ruptures are 2–9% lower than those obtained by



874 considering the full suprasalt thickness alone, and 4–15% lower than estimates  
875 involving the entire seismogenic crust.

876 Overall, these findings greatly enhance our understanding of the seismogenic  
877 potential of the southwestern Valencia Trough, an offshore area near densely  
878 populated areas. These findings provide a basis for improved seismic hazard  
879 assessments. Additionally, as we are addressing offshore faults exhibiting vertical  
880 displacement, our findings can be used to establish the tsunamigenic potential of  
881 this region. Furthermore, this approach for incorporating mechanical  
882 heterogeneities in the seismogenic crust can be applied to other regions and  
883 tectonic settings with analogous structural configurations.

884

885



886 **10. Author contribution**

887 Martin-Rojas, I.: Conceptualization, Data curation, Formal analysis, Funding  
888 acquisition, Investigation, Methodology, Project administration, Supervision,  
889 Validation, Visualization, Writing – original draft preparation, review & editing

890 Ramos, A.: Data curation, Formal analysis, Funding acquisition, Investigation,  
891 Resources, Visualization, Writing – original draft preparation, review & editing

892 De Ruig, M.: Data curation, Formal analysis, Investigation, Resources,  
893 Visualization, Writing – original draft preparation, review & editing

894 Medina-Cascales, I.: Data curation, Formal analysis, Investigation, Visualization,  
895 Writing –review & editing

896 Santamaría-Pérez, E.: Data curation, Formal analysis, Investigation, Writing –  
897 review & editing

898 Alfaro, P.: Data curation, Formal analysis, Investigation, Supervision, Writing –  
899 review & editing

900

901 **11. Competing interests**

902 The authors declare that they have no conflict of interest.

903

904 **13. Financial support**

905 This research was funded by the Spanish Ministry of Science, Innovation and  
906 University (research projects PID2021-127967NB-I00 and RTI2018-100737-B-I00),  
907 Generalitat Valenciana (Valencian Regional Government, research projects  
908 AICO2021/196 and CIAPOS/2022/082, and University of Alicante (research project  
909 VIGROB053). The authors acknowledge the use of the MOVE Software Suite granted  
910 by PE Limited (Petex).

911



912

## References

- 913 Agustí, J., Santos-Cubedo, A., Furió, M., De Marfá, R., Blain, H., Oms, O., & Sevilla, P.  
914 (2011). The late Neogene-early Quaternary small vertebrate succession from the  
915 Almenara-Casablanca karst complex (Castellón, Eastern Spain): Chronologic and  
916 paleoclimatic context. *Quaternary International*, 243(1), 183–191.  
917 10.1016/j.quaint.2010.11.016
- 918 Albarracín, S., Alcántara-Carrió, J., Barranco, A., Sánchez García, M. J., Fontán Bouzas, Á,  
919 & Rey Salgado, J. (2013). Seismic evidence for the preservation of several stacked  
920 Pleistocene coastal barrier/lagoon systems on the Gulf of Valencia continental shelf  
921 (western Mediterranean). *Geo-Marine Letters*, 33(2-3), 217–223. 10.1007/s00367-  
922 012-0315-x
- 923 Arche, A., & López-Gómez, J. (1996). Origin of the Permian-Triassic Iberian Basin, central-  
924 eastern Spain. *Tectonophysics*, 266(1), 443–464. 10.1016/S0040-1951(96)00202-8
- 925 Bufo, E., & Udías, A. (2021). *El terremoto de Alcoy de 1620 y la serie sísmica de 1644 en*  
926 *la comarca de Muro*. Centro Nacional de Información Geográfica.
- 927 Bufo, E., Udías, A., Sanz de Galdeano, C., & Cesca, S. (2015). The 1748 Montesa  
928 (southeast Spain) earthquake — A singular event. *Tectonophysics*, 664, 139–153.  
929 10.1016/j.tecto.2015.09.005
- 930 Cameselle, A. L., Urgeles, R., De Mol, B., Camerlenghi, A., & Canning, J. C. (2014). Late  
931 Miocene sedimentary architecture of the Ebro Continental Margin (Western  
932 Mediterranean): implications to the Messinian Salinity Crisis. *International Journal of*  
933 *Earth Sciences : Geologische Rundschau*, 103(2), 423–440. 10.1007/s00531-013-  
934 0966-5



- 935 Casciello, E., Vergés, J., Saura, E., Casini, G., Fernández, N., Blanc, E., Homke, S., & Hunt,  
936 D. W. (2009). Fold patterns and multilayer rheology of the Lurestan Province, Zagros  
937 simply folded belt (Iran). *Journal of the Geological Society*, 166(5), 947–959.  
938 10.1144/0016-76492008-138
- 939 Cheng Jia, C. J., Rong, Y., Magistrale, H., Chen Guihua, C. G., & Xu Xiwei, X. X. (2019a).  
940 Earthquake rupture scaling relations for mainland China. *Seismological Research*  
941 *Letters*, 91(1), 248–261. 10.1785/0220190129
- 942 Cheng Jia, C. J., Rong, Y., Magistrale, H., Chen Guihua, C. G., & Xu Xiwei, X. X. (2019b).  
943 Earthquake rupture scaling relations for mainland China. *Seismological Research*  
944 *Letters*, 91(1), 248–261. 10.1785/0220190129
- 945 Clavell, E., & Berastegui, X. (1991). Petroleum geology of the Gulf of Valencia. *Generation,*  
946 *Accumulation, and Production of Europe's Hydrocarbons*, , 355–368.  
947 [https://www.scopus.com/inward/record.uri?eid=2-s2.0-](https://www.scopus.com/inward/record.uri?eid=2-s2.0-0026310072&partnerID=40&md5=8f34c3d495738519a9101eb775a91bd4)  
948 [0026310072&partnerID=40&md5=8f34c3d495738519a9101eb775a91bd4](https://www.scopus.com/inward/record.uri?eid=2-s2.0-0026310072&partnerID=40&md5=8f34c3d495738519a9101eb775a91bd4)
- 949 De Ruig, & M.J. (1992). *Tectono-sedimentary evolution of the Prebetic fold belt of Alicante*
- 950 Del Rio, V. D., Rey, J., & Vegas, R. (1986). The Gulf of Valencia continental shelf:  
951 Extensional tectonics in Neogene and Quaternary sediments. *Marine Geology*, 73(1),  
952 169–179. 10.1016/0025-3227(86)90117-9
- 953 DeMets, C., Gordon, R. G., Argus, D. F., & Stein, S. (1994). Effect of recent revisions to the  
954 geomagnetic reversal time scale on estimates of current plate motions. *Geophysical*  
955 *Research Letters*, 21(20), 2191–2194. 10.1029/94GL02118





- 956 Duffy, O. B., Gawthorpe, R. L., & Docherty, M. (2023). Tectono-stratigraphic evolution of  
957 salt-influenced normal fault systems: an example from the Coffee-Soil Fault, Danish  
958 North Sea. *Journal of the Geological Society*, 180(6), 1. 10.1144/jgs2023-016
- 959 Etheve, N., Frizon de Lamotte, D., Mohn, G., Martos, R., Roca, E., & Blanpied, C. (2016).  
960 Extensional vs contractional Cenozoic deformation in Ibiza (Balearic Promontory,  
961 Spain): Integration in the West Mediterranean back-arc setting. *Tectonophysics*, 682,  
962 35–55. 10.1016/j.tecto.2016.05.037
- 963 Faccenna, C., Piromallo, C., Crespo-Blanc, A., Jolivet, L., & Rossetti, F. (2004a). Lateral  
964 slab deformation and the origin of the western Mediterranean arcs. *Tectonics*  
965 (*Washington, D.C.*), 23(1), np–n/a. 10.1029/2002TC001488
- 966 Faccenna, C., Piromallo, C., Crespo-Blanc, A., Jolivet, L., & Rossetti, F. (2004b). Lateral  
967 slab deformation and the origin of the western Mediterranean arcs. *Tectonics*  
968 (*Washington, D.C.*), 23(1), np–n/a. 10.1029/2002TC001488
- 969 Fang, P., Tugend, J., Mohn, G., Kuszniir, N., & Ding, W. (2021a). Evidence for rapid large-  
970 amplitude vertical motions in the Valencia Trough (Western Mediterranean)  
971 generated by 3D subduction slab roll-back. *Earth and Planetary Science Letters*, 575,  
972 117179. 10.1016/j.epsl.2021.117179
- 973 Fang, P., Tugend, J., Mohn, G., Kuszniir, N., & Ding, W. (2021b). Evidence for rapid large-  
974 amplitude vertical motions in the Valencia Trough (Western Mediterranean)  
975 generated by 3D subduction slab roll-back. *Earth and Planetary Science Letters*, 575,  
976 117179. 10.1016/j.epsl.2021.117179
- 977 Ford, M., Le Carlier de Veslud, C., & Bourgeois, O. (2007). Kinematic and geometric  
978 analysis of fault-related folds in a rift setting: The Dannemarie basin, Upper Rhine



- 979 Graben, France. *Journal of Structural Geology*, 29(11), 1811–1830.
- 980 10.1016/j.jsg.2007.08.001
- 981 García-Mayordomo, J., Insua-Arévalo, J. M., Martínez-Díaz, J. J., Jiménez-Díaz, A., Martín-
- 982 Banda, R., Martín-Alfageme, S., Álvarez-Gómez, J. A., Rodríguez-Peces, M., Pérez-
- 983 López, R., Rodríguez-Pascua, M. A., Masana, E., Perea, H., Martín-González, F.,
- 984 Giner-Robles, J., Nemser, E. S., & Cabral, J. (2012). The Quaternary active faults
- 985 database of Iberia (QAFI v. 2.0). *Journal of Iberian Geology*,
- 986 38(1)10.5209/rev\_JIGE.2012.v38.n1.39219
- 987 Gaspar-Escribano, J. M., Garcia-Castellanos, D., Roca, E., & Cloetingh, S. (2004).
- 988 Cenozoic vertical motions of the Catalan Coastal Ranges (NE Spain): The role of
- 989 tectonics, isostasy, and surface transport. *Tectonics (Washington, D.C.)*, 23(1), np–
- 990 n/a. 10.1029/2003TC001511
- 991 Geel, T. (1995). Oligocene to early Miocene tectono-sedimentary history of the Alicante
- 992 region (SE Spain): implications for Western Mediterranean evolution. *Basin Research*,
- 993 7(4), 313–336. 10.1111/j.1365-2117.1995.tb00120.x
- 994 Geller, R. J. (1976). Scaling relations for earthquake source parameters and magnitudes.
- 995 *Bulletin of the Seismological Society of America*, 66(5), 1501–1523.
- 996 <https://pubs.geoscienceworld.org/ssa/bssa/article/66/5/1501/117604>
- 997 González, Á. (2017). The Spanish National Earthquake Catalogue: Evolution, precision and
- 998 completeness. *Journal of Seismology*, 21(3), 435–471. 10.1007/s10950-016-9610-8
- 999 Guimera, J., & Alvaro, M. (1990). Structure et évolution de la compression alpine dans la
- 1000 Chaîne ibérique et la Chaîne côtière catalane (Espagne). *Bulletin De La Société*
- 1001 *Géologique De France*, 6(2), 339–348. 10.2113/gssgfbull.VI.2.339



- 1002 Hongxing, G., & Anderson, J. K. (2007). Fault throw profile and kinematics of Normal fault:  
1003 conceptual models and geologic examples. *Geological Journal of China Universities*,  
1004 13(1), 75.
- 1005 Huang, J., Abrahamson, N. A., Sung, C., & Chao, S. (2024). New Empirical Source-Scaling  
1006 Laws for Crustal Earthquakes Incorporating Fault Dip and Seismogenic-Thickness  
1007 Effects. *Seismological Research Letters*, 95(4), 2352–2367. 10.1785/0220240034
- 1008 Hyndman, R. D., Yamano, M., & Oleskevich, D. A. (1997). The seismogenic zone of  
1009 subduction thrust faults. *Island Arc*, 6(3), 244–260. 10.1111/j.1440-  
1010 1738.1997.tb00175.x
- 1011 IGN. (2025). *Instituto Geográfico Nacional (2025) Servicio de Información Sísmica*.
- 1012 Jackson, C. A. -, & Rotevatn, A. (2013). 3D seismic analysis of the structure and evolution  
1013 of a salt-influenced normal fault zone: A test of competing fault growth models.  
1014 *Journal of Structural Geology*, 54, 215–234. 10.1016/j.jsg.2013.06.012
- 1015 Jackson, M. P. A., & Hudec, M. R. (2005). Stratigraphic record of translation down ramps in  
1016 a passive-margin salt detachment. *Journal of Structural Geology*, 27(5), 889–911.  
1017 10.1016/j.jsg.2005.01.010
- 1018 Jolivet, L., & Faccenna, C. (2000). Mediterranean extension and the Africa-Eurasia  
1019 collision. *Tectonics*, 19(6), 1095–1106. 10.1029/2000TC900018
- 1020 Kanamori, H., & Anderson, D. L. (1975). Theoretical basis of some empirical relations in  
1021 seismology. *Bulletin of the Seismological Society of America*, 65(5), 1073–1095.  
1022 <https://pubs.geoscienceworld.org/ssa/bssa/article/65/5/1073/117458>



- 1023 Kane, K. E., Jackson, C. A. -, & Larsen, E. (2010). Normal fault growth and fault-related  
1024 folding in a salt-influenced rift basin: South Viking Graben, offshore Norway. *Journal*  
1025 *of Structural Geology*, 32(4), 490–506. 10.1016/j.jsg.2010.02.005
- 1026 Leonard, M. (2010). Earthquake fault scaling; self-consistent relating of rupture length,  
1027 width, average displacement, and moment release. *Bulletin of the Seismological*  
1028 *Society of America*, 100(5A), 1971–1988. 10.1785/0120090189
- 1029 Leonard, M. (2014). Self-consistent earthquake fault-scaling relations; update and  
1030 extension to stable continental strike-slip faults. *Bulletin of the Seismological Society*  
1031 *of America*, 104(6), 2953–2965. 10.1785/0120140087
- 1032 Lirer, F., Foresi, L. M., Iaccarino, S. M., Salvatorini, G., Turco, E., Cosentino, C., Sierro, F.  
1033 J., & Caruso, A. (2019). Mediterranean Neogene planktonic foraminifer biozonation  
1034 and biochronology. *Earth-Science Reviews*, 196, 102869.  
1035 10.1016/j.earscirev.2019.05.013
- 1036 Lofi, J. (2011). *Seismic atlas of the "Messinian salinity crisis" markers in the Mediterranean*  
1037 *and Black Seas*. Commission for the Geological Map of the World.
- 1038 Maillard, A., Mauffret, A., Watts, A. B., Torné, M., Pascal, G., Buhl, P., & Pinet, B. (1992).  
1039 Tertiary sedimentary history and structure of the Valencia trough (western  
1040 Mediterranean). *Tectonophysics*, 203(1), 57–75. 10.1016/0040-1951(92)90215-R
- 1041 Maillard, A., & Mauffret, A. (2013). Structure and present-day compression in the offshore  
1042 area between Alicante and Ibiza Island (Eastern Iberian Margin). *Tectonophysics*,  
1043 591, 116–130. 10.1016/j.tecto.2011.07.007



- 1044 Mansfield, C. S., & Cartwright, J. A. (1996). High resolution fault displacement mapping  
1045 from three-dimensional seismic data: evidence for dip linkage during fault growth.  
1046 *Journal of Structural Geology*, 18(2), 249–263. 10.1016/S0191-8141(96)80048-4
- 1047 Marsh, N., Imber, J., Holdsworth, R. E., Brockbank, P., & Ringrose, P. (2010). The structural  
1048 evolution of the Halten Terrace, offshore Mid-Norway: extensional fault growth and  
1049 strain localisation in a multi-layer brittle-ductile system. *Basin Research*, 22(2), 195–  
1050 214. 10.1111/j.1365-2117.2009.00404.x
- 1051 Martí, J., Mitjavila, J., Roca, E., & Aparicio, A. (1992). Cenozoic magmatism of the valencia  
1052 trough (western mediterranean): Relationship between structural evolution and  
1053 volcanism. *Tectonophysics*, 203(1), 145–165. 10.1016/0040-1951(92)90221-Q
- 1054 Martínez-Solares, J. M., & Mezcuá, J. (2002). *Catálogo sísmico de la Península Ibérica*.  
1055 Madrid (Spain): Instituto Geográfico Nacional.
- 1056 Maurin, J., & Nivière, B. (1999). Extensional forced folding and décollement of the pre-rift  
1057 series along the Rhine graben and their influence on the geometry of the syn-rift  
1058 sequences. *Forced Folds and Fractures* (pp. 73–86). The Geological Society of  
1059 London. 10.1144/GSL.SP.2000.169.01.06
- 1060 McClusky, S., Reilinger, R., Mahmoud, S., Ben Sari, D., & Tealeb, A. (2003). GPS  
1061 constraints on Africa (Nubia) and Arabia plate motions. *Geophysical Journal*  
1062 *International*, 155(1), 126–138. 10.1046/j.1365-246X.2003.02023.x
- 1063 Molinaro, M., Leturmy, P., Guezou, J. -, Frizon de Lamotte, D., & Eshraghi, S. A. (2005).  
1064 The structure and kinematics of the southeastern Zagros fold-thrust belt, Iran: From  
1065 thin-skinned to thick-skinned tectonics. *Tectonics*, 24(3), np–n/a.  
1066 10.1029/2004TC001633



- 1067 Morley, C. K., Back, S., Van Rensbergen, P., Crevello, P., & Lambiase, J. J. (2003).  
1068 Characteristics of repeated, detached, Miocene–Pliocene tectonic inversion events,  
1069 in a large delta province on an active margin, Brunei Darussalam, Borneo. *Journal of*  
1070 *Structural Geology*, 25(7), 1147–1169. 10.1016/S0191-8141(02)00130-X
- 1071 NEBOT, M., & GUIMERÀ, J. (2018). Kinematic evolution of a fold-and-thrust belt developed  
1072 during basin inversion: the Mesozoic Maestrat basin, E Iberian Chain. *Geological*  
1073 *Magazine*, 155(3), 630–640. 10.1017/S001675681600090X
- 1074 Nicol, A., Watterson, J., Walsh, J. J., & Childs, C. (1996). The shapes, major axis  
1075 orientations and displacement patterns of fault surfaces. *Journal of Structural*  
1076 *Geology*, 18(2), 235–248. 10.1016/S0191-8141(96)80047-2
- 1077 Nissen, E., Ghorashi, M., Jackson, J., Parsons, B., & Talebian, M. (2007). The 2005 Qeshm  
1078 Island earthquake (Iran)—a link between buried reverse faulting and surface folding  
1079 in the Zagros Simply Folded Belt? *Geophysical Journal International*, 171(1), 326–338.  
1080 10.1111/j.1365-246X.2007.03514.x
- 1081 Nissen, E., Tatar, M., Jackson, J. A., & Allen, M. B. (2011). New views on earthquake  
1082 faulting in the Zagros fold-and-thrust belt of Iran. *Geophysical Journal International*,  
1083 186(3), 928–944. 10.1111/j.1365-246X.2011.05119.x
- 1084 Nocquet, J. -, & Calais, E. (2003). Crustal velocity field of western Europe from permanent  
1085 GPS array solutions, 1996–2001. *Geophysical Journal International*, 154(1), 72–88.  
1086 10.1046/j.1365-246X.2003.01935.x
- 1087 Nocquet, J. (2012). Present-day kinematics of the Mediterranean: A comprehensive  
1088 overview of GPS results. *Tectonophysics*, 579, 220–242. 10.1016/j.tecto.2012.03.037



- 1089 Palano, M., González, P. J., & Fernández, J. (2015). The Diffuse Plate boundary of Nubia  
1090 and Iberia in the Western Mediterranean: Crustal deformation evidence for viscous  
1091 coupling and fragmented lithosphere. *Earth and Planetary Science Letters*, 430, 439–  
1092 447. 10.1016/j.epsl.2015.08.040
- 1093 Pascal, G., Torné, M., Buhl, P., Watts, A. B., & Mauffret, A. (1992). Crustal and velocity  
1094 structure of the Valencia trough (western Mediterranean), Part II. Detailed  
1095 interpretation of five Expanded Spread Profiles. *Tectonophysics*, 203(1), 21–35.  
1096 10.1016/0040-1951(92)90213-P
- 1097 PASCOE, R., HOOPER, R., STORHAUG, K., & HARPER, H. (Jan 1, 1999). Evolution of  
1098 extensional styles at the southern termination of the Nordland Ridge, Mid-Norway: a  
1099 response to variations in coupling above Triassic salt. Paper presented at the , 5(1)  
1100 83–90. 10.1144/0050083 <https://www.lyellcollection.org/doi/10.1144/0050083>
- 1101 Perea, H. (2006). *Falles actives i perillositat sísmica al marge nord-occidental del solc de*  
1102 *València*
- 1103 Pérez-Peña, A., Martín-Davila, J., Gárate, J., Berrocoso, M., & Bufo, E. (2010). Velocity  
1104 field and tectonic strain in Southern Spain and surrounding areas derived from GPS  
1105 episodic measurements. *Journal of Geodynamics*, 49(3), 232–240.  
1106 10.1016/j.jog.2010.01.015
- 1107 Ramos, A., Lopez-Mir, B., Wilson, E. P., Granado, P., & Muñoz, J. A. (2020). 3D  
1108 reconstruction of syn-tectonic strata in a salt-related orogen: learnings from the Lleret  
1109 syncline (South-central Pyrenees). *Acta Geológica Hispanica*, 18(1), 1–19.  
1110 10.1344/GeologicaActa2020.18.20



- 1111 Ramos, A., de Ruig, M. J., Pedrera, A., Alfaro, P., & Martin-Rojas, I. (2025). Salt expulsion  
1112 triggered by prograding clinoforms in the SW Valencia Trough (SE Spain). *Marine and*  
1113 *Petroleum Geology*, 173, 107268. 10.1016/j.marpetgeo.2024.107268
- 1114 Ramos, A., Pedrera, A., García-Senz, J., López-Mir, B., & Salas, R. (2023). Seismic  
1115 evidence for ductile necking of the mid-lower crust beneath the Columbrets Basin  
1116 (Western Mediterranean). *Terra Nova (Oxford, England)*, 35(5), 404–412.  
1117 10.1111/ter.12664
- 1118 Rehault, J., Boillot, G., & Mauiffret, A. (1984). The Western Mediterranean Basin geological  
1119 evolution. *Marine Geology*, 55(3), 447–477. 10.1016/0025-3227(84)90081-1
- 1120 Ribó, M., Puig, P., Muñoz, A., Lo Iacono, C., Masqué, P., Palanques, A., Acosta, J., Guillén,  
1121 J., & Gómez Ballesteros, M. (2016a). Morphobathymetric analysis of the large fine-  
1122 grained sediment waves over the Gulf of Valencia continental slope (NW  
1123 Mediterranean). *Geomorphology*, 253, 22–37. 10.1016/j.geomorph.2015.09.027
- 1124 Ribó, M., Puig, P., Urgeles, R., Van Rooij, D., & Muñoz, A. (2016b). Spatio-temporal  
1125 evolution of sediment waves developed on the Gulf of Valencia margin (NW  
1126 Mediterranean) during the Plio-Quaternary. *Marine Geology*, 378, 276–291.  
1127 10.1016/j.margeo.2015.11.011
- 1128 Richardson, N. J., Underhill, J. R., & Lewis, G. (2005). The role of evaporite mobility in  
1129 modifying subsidence patterns during normal fault growth and linkage, Halten  
1130 Terrace, Mid-Norway. *Basin Research*, 17(2), 203–223. 10.1111/j.1365-  
1131 2117.2005.00250.x





- 1132 Roca, E. (1994). La evolución geodinámica de la Cuenca Catalano-Balear y áreas  
1133 adyacentes desde el Mesozoico hasta la actualidad. *Acta Geologica Hispanica*,  
1134 29(1), 3–25. <https://raco.cat/index.php/ActaGeologica/article/view/75462>
- 1135 Roca, E. (2001). The Northwest Mediterranean Basin (Valencia Trough, Gulf of Lions and  
1136 Liguro-Provençal basins): structure and geodynamic evolution. *Mem. Mus. Natl. Hist.*  
1137 *Nat. (France)* (pp. 671–706)
- 1138 Roca, E., Frizon de Lamotte, D., Mauffret, A., Bracene, R., Verges, J., Benaouali, N.,  
1139 Fernandez, M., Munoz, J. A., & Zeyen, H. (2004). TRANSMED-transect II (Aquitaine  
1140 basin, Pyrenees, Ebro basin, Catalan coastal ranges, Valencia trough, Balearic  
1141 promontory, Algerian basin, Tell, Sahara Atlas, Sahara platform). In : W. Cavazza, F.  
1142 Roure, W. Spakman, G.M. Stampfli and P.A. Ziegler (Eds). The TRANSMED Atlas - the  
1143 Mediterranean region from Crust to Mantle. *Springer, Berlin* [https://hal.science/hal-](https://hal.science/hal-00069583)  
1144 [00069583](https://hal.science/hal-00069583)
- 1145 Roca, E., & Desegaulx, P. (1992). Analysis of the geological evolution and vertical  
1146 movements in the València Trough area, western Mediterranean. *Marine and*  
1147 *Petroleum Geology*, 9(2), 167, IN1, 177–176, IN8, 185. 10.1016/0264-8172(92)90089-W
- 1148 Roca, E., & Guimerà, J. (1992). The Neogene structure of the eastern Iberian margin:  
1149 Structural constraints on the crustal evolution of the Valencia trough (western  
1150 Mediterranean). *Tectonophysics*, 203(1), 203–218. 10.1016/0040-1951(92)90224-T
- 1151 Roca, E., Sans, M., Cabrera, L., & Marzo, M. (1999). Oligocene to Middle Miocene  
1152 evolution of the central Catalan margin (northwestern Mediterranean).  
1153 *Tectonophysics*, 315(1), 209–229. 10.1016/S0040-1951(99)00289-9



- 1154 Rouby, D., Guillocheau, F., Robin, C., Bouroullec, R., Raillard, S., Castelltort, S., & Nalpas,  
1155 T. (2003). Rates of deformation of an extensional growth fault/raft system (offshore  
1156 Congo, West African margin) from combined accommodation measurements and 3-  
1157 D restoration. *Basin Research*, 15(2), 183–200. 10.1046/j.1365-2117.2003.00200.x
- 1158 Roustaei, M., Nissen, E., Abbassi, M., Gholamzadeh, A., Ghorashi, M., Tatar, M., Yamini-  
1159 Fard, F., Bergman, E., Jackson, J., & Parsons, B. (2010). The 2006 March 25 Fin  
1160 earthquakes (Iran)—insights into the vertical extents of faulting in the Zagros Simply  
1161 Folded Belt. *Geophysical Journal International*, 181(3), 1275–1291. 10.1111/j.1365-  
1162 246X.2010.04601.x
- 1163 Ruff, L., & Kanamori, H. (1983). Seismic coupling and uncoupling at subduction zones.  
1164 *Tectonophysics*, 99(2), 99–117. 10.1016/0040-1951(83)90097-5
- 1165 Ruig, M. J. d. (1996). Extensional diapirism in the eastern Prebetic foldbelt, southeastern  
1166 Spain. *AAPG Memoir*, (65) <https://www.osti.gov/biblio/585188>
- 1167 Sàbat, F., Gelabert, B., Rodríguez-Perea, A., & Giménez, J. (2011). Geological structure  
1168 and evolution of Majorca: Implications for the origin of the Western Mediterranean.  
1169 *Tectonophysics*, 510(1), 217–238. 10.1016/j.tecto.2011.07.005
- 1170 SALAS, R., GUIMERA, J., MAS, R., MARTIN-CLOSAS, C., MELENDEZ, A., & ALONSO, A.  
1171 (2001a). Evolution of the Mesozoic Central Iberian Rift System and its Cainozoic  
1172 inversion (Iberian chain). *Mémoires Du Muséum National D'histoire Naturelle* (1993),  
1173 186, 145–186.
- 1174 SALAS, R., GUIMERA, J., MAS, R., MARTIN-CLOSAS, C., MELENDEZ, A., & ALONSO, A.  
1175 (2001b). Evolution of the Mesozoic Central Iberian Rift System and its Cainozoic



- 1176 inversion (Iberian chain). *Mémoires Du Muséum National D'histoire Naturelle* (1993),  
1177 186, 145–186.
- 1178 Seranne, M. (1999). The Gulf of Lion continental margin (NW Mediterranean) revisited by  
1179 IBS: an overview. *Geological Society special publication* (pp. 15–36). The Geological  
1180 Society of London. 10.1144/GSL.SP.1999.156.01.03
- 1181 Serpelloni, E., Vannucci, G., Pondrelli, S., Argnani, A., Casula, G., Anzidei, M., Baldi, P., &  
1182 Gasperini, P. (2007). Kinematics of the Western Africa-Eurasia plate boundary from  
1183 focal mechanisms and GPS data. *Geophysical Journal International*, 169(3), 1180–  
1184 1200. 10.1111/j.1365-246X.2007.03367.x
- 1185 Sherkati, S., Molinaro, M., Frizon de Lamotte, D., & Letouzey, J. (2005). Detachment  
1186 folding in the Central and Eastern Zagros fold-belt (Iran): salt mobility, multiple  
1187 detachments and late basement control. *Journal of Structural Geology*, 27(9), 1680–  
1188 1696. 10.1016/j.jsg.2005.05.010
- 1189 Soler y José, R., Martínez del Olmo, W., Megías, A. G., & Abeger Monteagudo, J. A. (1983).  
1190 Rasgos básicos del neógeno del Mediterráneo español. *Mediterránea. Serie de*  
1191 *Estudios Geológicos*, 1, 71–82.
- 1192 STAMPFLI, G. M., & HOCKER, C. F. W. (1989). Messinian palaeorelief from a 3-D seismic  
1193 survey in the Tarraco concession area (Spanish Mediterranean Sea). *Geologie En*  
1194 *Mijnbouw*, 68(2), 201–210.
- 1195 Stewart, S. A., Ruffell, A. H., & Harvey, M. J. (1997). Relationship between basement-linked  
1196 and gravity-driven fault systems in the UKCS salt basins. *Marine and Petroleum*  
1197 *Geology*, 14(5), 581–604. 10.1016/S0264-8172(97)00008-1



- 1198 Stich, D., Martín, R., & Morales, J. (2010). *Moment tensor inversion for Iberia-Maghreb*  
1199 *earthquakes 2005-2008*. Elsevier.
- 1200 Stich, D., Serpelloni, E., de Lis Mancilla, F., & Morales, J. (2006). Kinematics of the Iberia–  
1201 Maghreb plate contact from seismic moment tensors and GPS observations.  
1202 *Tectonophysics*, 426(3), 295–317. 10.1016/j.tecto.2006.08.004
- 1203 Stirling, M., Goded, T., Berryman, K., & Litchfield, N. (2013). Selection of earthquake  
1204 scaling relationships for seismic-hazard analysis. *Bulletin of the Seismological*  
1205 *Society of America*, 103(6), 2993–3011. 10.1785/0120130052
- 1206 Stirling, M., Rhoades, D., & Berryman, K. (2002). Comparison of earthquake scaling  
1207 relations derived from data of the instrumental and preinstrumental era. *Bulletin of*  
1208 *the Seismological Society of America*, 92(2), 812–830. 10.1785/0120000221
- 1209 Stock, C., & Smith, E. G. C. (2000). Evidence for different scaling of earthquake source  
1210 parameters for large earthquakes depending on faulting mechanism. *Geophysical*  
1211 *Journal International*, 143(1), 157–162. 10.1046/j.1365-246x.2000.00225.x
- 1212 Thorsen, C. E. (1963). Age of growth faulting in southeast Louisiana.
- 1213 Torné, M., Pascal, G., Buhl, P., Watts, A. B., & Mauffret, A. (1992). Crustal and velocity  
1214 structure of the Valencia trough (western Mediterranean), Part I. A combined  
1215 refraction/ wide-angle reflection and near-vertical reflection study. *Tectonophysics*,  
1216 203(1), 1–20. 10.1016/0040-1951(92)90212-O
- 1217 Tvedt, A. B. M., Rotevatn, A., Jackson, C. A. -, Fossen, H., & Gawthorpe, R. L. (2013).  
1218 Growth of normal faults in multilayer sequences: A 3D seismic case study from the



- 1219 Egersund Basin, Norwegian North Sea. *Journal of Structural Geology*, 55, 1–20.
- 1220 10.1016/j.jsg.2013.08.002
- 1221 van Hinsbergen, D. J. J., Torsvik, T. H., Schmid, S. M., Mañenco, L. C., Maffione, M.,
- 1222 Vissers, R. L. M., Gürer, D., & Spakman, W. (2020). Orogenic architecture of the
- 1223 Mediterranean region and kinematic reconstruction of its tectonic evolution since the
- 1224 Triassic. *Gondwana Research*, 81, 79–229. 10.1016/j.gr.2019.07.009
- 1225 van Hinsbergen, D. J. J., Vissers, R. L. M., & Spakman, W. (2014). Origin and consequences
- 1226 of western Mediterranean subduction, rollback, and slab segmentation. *Tectonics*
- 1227 (*Washington, D.C.*), 33(4), 393–419. 10.1002/2013TC003349
- 1228 Vargas, H., Gaspar-Escribano, J. M., López-Gómez, J., Van Wees, J., Cloetingh, S., de La
- 1229 Horra, R., & Arche, A. (2009). A comparison of the Iberian and Ebro Basins during the
- 1230 Permian and Triassic, eastern Spain: A quantitative subsidence modelling approach.
- 1231 *Tectonophysics*, 474(1), 160–183. 10.1016/j.tecto.2008.06.005
- 1232 Verges, J., & Sabat, F. (1999). Constraints on the Neogene Mediterranean kinematic
- 1233 evolution along a 1000 km transect from Iberia to Africa. *Geological Society special*
- 1234 *publication* (pp. 63–80). The Geological Society of London.
- 1235 10.1144/GSL.SP.1999.156.01.05
- 1236 Verges, J., & Fernandez, M. (2012). Tethys–Atlantic interaction along the Iberia–Africa
- 1237 plate boundary: The Betic–Rif orogenic system. *Tectonophysics*, 579, 144–172.
- 1238 10.1016/j.tecto.2012.08.032
- 1239 Wells, D. L., & Coppersmith, K. J. (1994). New empirical relationships among magnitude,
- 1240 rupture length, rupture width, rupture area, and surface displacement. *Bulletin of the*



- 1241        *Seismological Society of America*, 84(4), 974–1002.
- 1242        <https://pubs.geoscienceworld.org/ssa/bssa/article/84/4/974/119792>
- 1243        Weng, H., & Yang, H. (2017). Seismogenic width controls aspect ratios of earthquake
- 1244        ruptures. *Geophysical Research Letters*, 44(6), 2725–2732. 10.1002/2016gl072168
- 1245        Withjack, M. O., & Callaway, S. (2000). Active normal faulting beneath a salt layer; an
- 1246        experimental study of deformation patterns in the cover sequence. *AAPG Bulletin*,
- 1247        84(5), 627–651. 10.1306/C9EBCE73-1735-11D7-8645000102C1865D
- 1248        Withjack, M. O., Olson, J., & Peterson, E. (1990). Experimental models of extensional
- 1249        forced folds. *AAPG Bulletin*, 74(7), 1038–1054. 10.1306/0C9B23FD-1710-11D7-
- 1250        8645000102C1865D
- 1251        Yen, Y., & Ma, K. (2011a). Source-scaling relationship for M 4.6–8.9 earthquakes,
- 1252        specifically for earthquakes in the collision zone of Taiwan. *Bulletin of the*
- 1253        *Seismological Society of America*, 101(2), 464–481. 10.1785/0120100046
- 1254        Yen, Y., & Ma, K. (2011b). Source-scaling relationship for M 4.6–8.9 earthquakes,
- 1255        specifically for earthquakes in the collision zone of Taiwan. *Bulletin of the*
- 1256        *Seismological Society of America*, 101(2), 464–481. 10.1785/0120100046
- 1257        Zazo, C. (1979). El problema del límite Plio-Pleistoceno en el litoral S y SE de España.
- 1258        *Trabajos N/Q*, 9, 65–72.
- 1259
- 1260
- 1261
